# 1     **A novel enhancer RNA, Hmrhl, positively regulates its host gene, *phkb*, in** 2                                   **Chronic Myelogenous Leukemia**

3  
4     Roshan Fatima, Subhendu Roy Choudhury, Divya T. R., Utsa Bhaduri and M. R. S. Rao,  
5     Jawaharlal Nehru Centre for Advanced Scientific Research ( JNCASR), Bangalore.

## 6 7     **Abstract**

8     Noncoding RNAs are increasingly being accredited with key roles in gene regulation during  
9     development and disease. Here we report the discovery and characterization of a novel long  
10    noncoding RNA, Hmrhl, which shares synteny and partial sequence similarity with the mouse  
11    lncRNA, Mrhl. The human homolog, Hmrhl, transcribed from intron 14 of *phkb* gene, is  
12    5.5kb in size, expressed in all tissues examined and has acquired additional repeat elements.  
13    Analysis of Hmrhl locus using ENCODE database revealed that it is associated with  
14    hallmarks of enhancers like the open chromatin configuration, binding of transcription  
15    factors, enhancer specific histone signature etc. in the K562 Chronic Myelogenous Leukemia  
16    (CML) cells. We compared the expression of Hmrhl in the normal lymphoblast cell line,  
17    GM12878, with that of K562 cells and lymphoma samples and show that it is highly  
18    upregulated in leukemia as well as several cases of lymphoma. We validated the enhancer  
19    properties of Hmrhl locus in K562 cells with the help of Luciferase assay. Moreover, siRNA  
20    mediated down-regulation of Hmrhl in K562 cells leads to a concomitant down regulation of  
21    its parent gene, *phkb*, showing that Hmrhl functions as an enhancer RNA and positively  
22    regulates its host gene, *phkb*, in chronic myelogenous leukemia.

## 23    **Introduction**

24    Genome projects in recent years have revealed the fact that mammalian genome is transcribed  
25    virtually in entirety, but only a fraction of it is translated<sup>1</sup>, thus generating a plethora of  
26    noncoding RNAs (both long and short noncoding RNAs), the functions of a vast majority of

27 which are yet to be determined. There has been a recent spurt in the studies of long noncoding  
28 RNAs (lncRNAs), demonstrating diverse roles not only in gene regulation during  
29 development and disease but also in evolution and complexity of organisms<sup>2-3</sup>. Enhancers  
30 constitute one such category of regulatory noncoding sequences that enhance the expression  
31 of their coding counterparts irrespective of their position, orientation and distance<sup>4-6</sup>. Any  
32 variation in enhancer sequence could lead to altered gene expression and consequent disease  
33 conditions<sup>7</sup>. Besides, super enhancers have been identified which consist of clusters of  
34 enhancers that are mainly associated with genes that define cell identity<sup>8-10</sup>. Recently, it has  
35 been observed that enhancers are actively transcribed giving rise to enhancer RNAs (eRNAs),  
36 making them the latest addition to the ever expanding list of regulatory noncoding RNAs. The  
37 eRNAs play a critical role in enhancer-promoter looping to bring about the activation of  
38 neighbouring protein coding genes<sup>11-14</sup>. In fact the enigmatic association of the gene desert  
39 loci with cancer has now been attributed to the enhancer derived long noncoding RNAs  
40 transcribed from the gene desert loci. For example, the 8q24 gene desert locus is known to  
41 give rise to several tissue specific long noncoding RNAs in different human cancers. CCAT1-  
42 L (Colorectal Cancer Associated Transcript-1) is one such enhancer RNA transcribed from a  
43 super enhancer region of 8q24 gene desert and has been shown to mediate long range  
44 chromatin interactions of Myc oncogene with its enhancers<sup>15</sup>. Further, a set of lncRNAs  
45 named as CARLoS (Cancer-Associated Region Long noncoding RNAs) is also known to be  
46 transcribed from the 8q24 gene desert region. One of them, CARLo5 is an oncogenic  
47 lncRNA associated with increased susceptibility to cancer and has been shown to be involved  
48 in long range chromatin interactions between Myc enhancer region and the promoter region  
49 of CARLo-5<sup>16</sup>.

50 Our lab had previously identified an intronic long noncoding RNA, Mrhl (Meiotic  
51 recombination hot spot locus RNA) in mouse<sup>17</sup>. The Mrhl lncRNA is 2.4kb in size and

52 expressed in multiple tissues in mouse and is shown to be nuclear restricted<sup>18</sup>. Diverse roles  
53 have been attributed to Mrhl in cellular processes and signalling pathways. For example, it  
54 has been reported that Mrhl negatively regulates Wnt signalling in mouse spermatogonial  
55 cells through its interaction with p68 RNA helicase<sup>19</sup>. Conversely, the regulation of  
56 Mrhl by Wnt signalling has also been reported<sup>20</sup>. Moreover, genome wide  
57 chromatin occupancy of Mrhl and its role in gene regulation has been explored<sup>21</sup>. Very  
58 recently, the role of Mrhl in regulation of Sox8 expression and meiotic commitment of  
59 spermatogonial cells has been described<sup>22</sup>. In the current communication, we report the  
60 identification and characterization of its human homolog, Hmrhl, and show that Hmrhl  
61 functions as an enhancer RNA for its host gene, *phkb*, in K562 Chronic Myelogenous  
62 Leukemia cells.

## 63 **Results**

### 64 **Syntenic Conservation of Mrhl in humans within the *phkb* gene**

65 The Mrhl long noncoding RNA is transcribed from the intron 15 of the *phkb* gene located on  
66 chromosome 8 in mouse (Fig1.i). Noncoding RNAs are poorly conserved across species and  
67 it had earlier been reported from our lab that the Mrhl lncRNA is not conserved in human<sup>18</sup>.  
68 However, a low stringency blast of Mrhl sequence revealed that it is partially conserved in  
69 human within the same host gene, *phkb*, thus sharing synteny (Fig1.ii). The human homolog  
70 is transcribed from the intron 14 of the *phkb* gene (with respect to transcript # 201, the  
71 longest transcript of *phkb*, ENSEMBLE genome browser; Fig1.iii). The sequence from the  
72 middle region of Mrhl to the 3'end is conserved in human as two segments, with 71%  
73 identity over a stretch of 152bp and 65% identity over a stretch of 1223bp (Fig.1.iv-v).  
74 Therefore, the mouse Mrhl long noncoding RNA shares both synteny and partial sequence  
75 similarity with its human homolog, which we have named as human Mrhl or Hmrhl.

76 **Hmrhl is expressed in multiple human tissues**

77 Once it became clear that the Mrhl sequence is conserved in human, we were curious to  
78 know whether the human homolog is expressed. For this, a cDNA panel of 16 different  
79 human tissues was obtained (Clontech, USA) and used to examine the expression of Hmrhl  
80 by quantitative Real Time PCR (qRT-PCR). Glycerldehyde-3-phosphate dehydrogenase  
81 (GAPDH) was used as an internal control and the data was plotted following the standard  $2^{-\Delta\Delta CT}$   
82  $\Delta\Delta CT$  method. Low level of Hmrhl expression (high cT values) was indeed observed in all of  
83 the human tissues examined (Fig.2a). Among all, the Hmrhl expression was highest in  
84 Spleen and Pancreas followed by Testis and other tissues (Fig.2a).

85 **Hmrhl is 5523bp in size, much larger than its mouse homolog**

86 For a detailed characterization of Hmrhl lncRNA, we used the most commonly available  
87 commercial cell line, human embryonic kidney cells (HEK293T) as well as the K562 CML  
88 cells. Hmrhl sequence was cloned in pGEM3Zf(+) vector to generate a template for a  
89 northern probe. The Hmrhl specific probe detected a single band in the northern blot  
90 indicating the presence of the Hmrhl transcript (Fig.2b), the size of which was much larger  
91 (~5kb) as compared to Mrhl (2.4kb). In order to determine the exact size of Hmrhl lncRNA,  
92 Primer Walking method was further employed to reach the ends of Hmrhl cDNA from the  
93 middle conserved region. Commercially available panel of human cDNA of different tissues  
94 (Clontech, USA), as well as the HEK293T cDNA was used in combination with different  
95 overlapping sets of primers (Fig.S1). This experiment revealed the size of Hmrhl to be  
96 5523bp, corresponding to chr16: 47658923-47664446 on GRCh37/ hg19, the genome  
97 build available at the time of mapping and chr16: 47625012-47630534 on GRCh38/ hg38, the  
98 current genome build. The sequence for Hmrhl is submitted to the NCBI (Genbank ID  
99 MF784605, FigS2).

100 We next investigated the coding potential of *Hmrhl* with NCBI ORF Finder which showed  
101 the presence of 1510bp long ORF (Fig.S3), though its translation is highly unlikely as  
102 discussed in supplementary data. To further examine the plausible coding potential of *Hmrhl*,  
103 the online tools CPAT analysis (Fig. S4) and PhyloCSF were used (see methods section for  
104 details) showing and strongly advocating that no approximate coding regions or novel coding  
105 regions are present (Fig.2c).

106 Syntenic conservation of *Hmrhl* allowed us to further explore its sequence conservation  
107 across species through evolution. Phylogenetic tree for *Hmrhl* was generated using Circular  
108 phylogenetic tree built in iTOL (Interactive Tree of Life), as shown in Fig.2d. Among the  
109 twenty-three-selected species, the *Hmrhl* sequence seems to have its closest similarity with  
110 the conserved region present in the Gorilla followed by Chimp, although the single exonic  
111 *Hmrhl* carries a definite region that appears to be highly conserved among primates.

#### 112 **Analysis of *Hmrhl* locus using ENCODE portal**

113 Data from the ENCODE Project Consortium<sup>1</sup> (visualized through the UCSC genome  
114 browser) was analysed exhaustively with respect to the *Hmrhl* cytogenetic region and the  
115 parent *phkb* gene to gain an insight into the structural and functional properties of *Hmrhl*.  
116 Remarkably, the ENCODE database revealed several interesting facts about *Hmrhl* genomic  
117 interval as discussed below.

#### 118 ***Hmrhl* has acquired several repeat elements during evolution**

119 A comparison of the genomic sequences in and around *Hmrhl* region from lower to higher  
120 vertebrates shows that the sequence appears to have been acquired initially in lower  
121 mammals like platypus during evolution and then evolved rapidly by insertion of repeat  
122 elements, especially in primates. *Hmrhl* has acquired seven different repeat elements in  
123 humans, L2b, L2c, MIR, Charlie 15a, AluY, L1PA3 and AluSx (Repeat Masker), which

124 flank the unique central region (Fig3). While the central region is highly conserved from  
125 lower to higher mammals, the repeat elements present in Hmrhl are absent in lower  
126 organisms, including rodents. The mouse homolog has only one repeat element, RLT,  
127 which is not present in Hmrhl (data not shown).

### 128 **Hmrhl locus exhibits hallmarks of enhancer in K562 CML cells**

129 Encode database represents a true encyclopaedia of DNA elements and offers valuable  
130 information regarding various properties of the chromatin like DNase hypersensitive sites,  
131 transcription factor binding sites and transcriptional status, histone signature etc., across  
132 different cell types; through diverse organisms.

133 Interestingly, ENCODE database shed light on the fact that Hmrhl locus exhibits hallmarks  
134 of enhancers in the Chronic Myelogenous Leukemia cell line, K562. Hmrhl locus is  
135 associated with open chromatin configuration and the presence of DNase hypersensitive  
136 sites in the K562 cells but not so in the normal lymphoblast cell line, GM12878 (Fig.4a).  
137 Moreover, Hmrhl locus exhibits the binding of EP300, histone signatures H3K27Ac and  
138 H3K4Me1 that mark the enhancers as well as the H3K4Me3 signal, which marks the  
139 promoters, in K562 cells (Fig.4a). Particularly, the H3K27Ac enhancer mark is in the form  
140 of two distinct peaks at the 5' end of Hmrhl (Fig.4a). We validated these enhancer marks at  
141 Hmrhl locus using ChIP-Seq (Fig4 b-c). Furthermore, Chip-seq data from ENCODE shows  
142 the binding of RNA polymerase II and an array of transcription factors, namely, GATA1,  
143 PML, CCNT2, NR2F2, TRIM28, STAT5A, ATF1, cMyc, GATA2, IRF1, JUND, EGR1,  
144 RCOR1, BHLHE40, YY1, TAL1, REST, TEAD4, MAFF, MAX and Egr1 at the 5' end of  
145 Hmrhl (genomic co-ordinates ~chr16:47,658,800-47,659,606) in the K562 cell line  
146 (Fig.5a). Notably, most of these transcription factors have been linked to cancer in previous  
147 studies<sup>23-25</sup>. It is well known that transcription factors initially bind to enhancer elements and

148 recruit RNA PolIII and co-activators to target gene promoters through looping<sup>26-31</sup>. EP300 is  
149 a histone acetyl transferase, a transcriptional coactivator and a chromatin re-modeller known  
150 to be enriched at active enhancers and to increase gene transcription by relaxing the  
151 chromatin and recruiting the transcriptional machinery<sup>32-33</sup>. All these observations strongly  
152 suggested that Hmrhl locus is transcriptionally highly active in K562 leukemic cells and that  
153 it possesses regulatory properties.

154 One of the most significant disclosures of the Encode portal with respect to the Hmrhl is the  
155 fact that the Hmrhl locus loops and interacts with the promoter of its parent gene, *phkb*, in  
156 K562 leukemia cells, thus acting as an enhancer for *phkb* gene. This fact was revealed  
157 through the ChiaPET (Chromatin interaction analysis with Paired End Tag sequencing, a  
158 combination of ChIPseq and 5C, Fig.5b-d) data of ENCODE project.

159 With this background information regarding Hmrhl locus from the Encode database as  
160 described above, we set out to elucidate its functional properties. We examined the  
161 expression profile of Hmrhl across various human cancers using a cancer specific cDNA  
162 panel (Origene, USA) by real time qPCR. Actin was used as an internal reference control.  
163 We observed different degrees of variation in the level of Hmrhl expression between  
164 normal and cancer samples under various cancers conditions. Significantly, it was observed  
165 that Hmrhl was highly upregulated in a number of lymphoma samples suggesting an  
166 active role for this RNA in solid tumors of blood cancer (Fig.6a). In addition, we  
167 compared the expression of Hmrhl and PHKB in the GM12878 and K562 cells by real  
168 time qPCR and found that both are over expressed in K562 leukemia cells as  
169 compared to normal lymphoblast (Fig.6 b-c).

170 **Luciferase assay validated the enhancer properties of Hmrhl locus**

171 In order to further ascertain the enhancer properties of Hmrhl genomic locus, we obtained  
172 the promoter and enhancer specific vectors pGL4.10 and pGL4.23, respectively (Promega,  
173 USA) for a luciferase assay. The pGL4.10 promoter vector does not possess any promoter,  
174 and hence can be used to identify promoter properties of any given DNA sequence when  
175 cloned upstream of the luciferase gene while the pGL4.23 enhancer vector has a minimal  
176 promoter upstream of luciferase gene and hence can be used to examine if a sequence of  
177 DNA has enhancer properties.

178 Three clones each for the promoter and enhancer vectors were generated using sequences in  
179 the 5' end of Hmrhl as inserts. Insert-1 had a sequence of -1000bp upstream of the 5' end of  
180 Hmrhl. Insert-2 included a sequence of +1 to +500bp downstream of the 5' end of Hmrhl  
181 (the region where various transcription factors and PolII were shown to bind by the Encode  
182 project), along with -300bp upstream sequence (800bp insert). Insert-3 included -1000bp  
183 upstream sequence and +500bp downstream sequences (1500bp insert). These inserts were  
184 cloned into the promoter and enhancer vectors, transfected in K562 cells and luciferase assay  
185 was performed to examine if any of these DNA sequences had regulatory properties.

186 Insert-1 did not generate any luciferase signal in combination with either promoter or  
187 enhancer vector, thus revealing that the -1000bp genomic sequence alone, upstream of the  
188 Hmrhl start site, has neither promoter nor enhancer properties. Insert-2 produced moderate  
189 signal both with promoter and enhancer vectors, suggesting that transcription factors and  
190 PolII indeed bound to this region, as also revealed in ENCODE database. Interestingly, an  
191 intense signal of luciferase activity was obtained with insert-3 (1.5kb) in combination with  
192 enhancer vector but not with promoter vector, confirming the fact that the sequences at the 5'  
193 end of Hmrhl indeed have strong enhancer properties (Fig.7a).

194 **Hmrhl functions as an enhancer RNA for *phkb***



195 After confirming the enhancer properties of Hmrhl locus by luciferase assay, we went on to  
196 probe if only the genomic segment has the regulatory properties, or the transcript arising  
197 from this region also takes part in the positive regulation of its parent gene, *phkb*. Specific  
198 siRNAs against the Hmrhl lncRNA were obtained in order to silence it. A pool of four  
199 different siRNAs was used to down regulate Hmrhl in K562 cells and its effect on PHKB  
200 expression was examined through quantitative PCR. PHKB was indeed found to be down-  
201 regulated upon down-regulation of Hmrhl, confirming the fact that Hmrhl acts as an  
202 enhancer RNA and positively regulates its parent *phkb* gene in K562 cells (Fig.7b). This  
203 experiment clearly established the role of Hmrhl as an enhancer RNA involved in the  
204 regulation of its host protein coding gene. Moreover, using another set of siRNAs (targeting  
205 different region of Hmrhl), we observed the similar down regulation of PHKB upon  
206 knockdown of Hmrhl (Fig.7c). We further probed if the PHKB expression is affected upon  
207 downregulation of Hmrhl in the GM12878 normal lymphoblast cells as well and found that  
208 PHKB is not down regulated in GM12878 cells unlike in K562 leukemia cells (Fig.7 d).

## 209 **Discussion**

210 Enhancers are mainly cis regulatory elements involved in the spatio-temporal regulation of  
211 gene expression. Enhancer derived transcripts were described initially way back in early  
212 1990s when it was reported that the HS2 enhancer of K562 cells gives rise to long enhancer  
213 transcripts<sup>34</sup>. Yet there had been a long silence in the discoveries and understanding related  
214 to enhancers and their probable mechanism of action. In fact enhancers were perceived only  
215 as segments of DNA<sup>4</sup> and the prospect of their transcription and a critical role for those  
216 transcripts in gene regulation was not envisaged. The discovery of enhancer RNAs came  
217 about rather recently, in 2010, with two papers describing the enhancer generated transcripts  
218 in mouse and human, respectively<sup>11-12</sup>. Since then, there has been a surge in studies related to

219 enhancer RNAs which endorse the fact that enhancer function is mediated through enhancer  
220 transcripts, changing the way we appreciate mechanism of gene regulation<sup>14, 35-40</sup>.

221 In the present communication, we report the identification and characterization of the  
222 human homolog, Hmrhl, of the mouse long noncoding RNA, Mrhl and show that Hmrhl  
223 functions an enhancer RNA for its host gene. Both the Mrhl as well as Hmrhl lncRNAs are  
224 transcribed from the introns of the same protein coding gene, *phkb*. Remarkably, as many  
225 as 50% of human protein coding genes are known to act as hosts for noncoding RNA genes  
226 including micro RNAs, small nucleolar RNAs and lncRNAs<sup>41</sup>.

227 Recent reports have implicated a large number of long noncoding RNAs in the pathogenesis  
228 of various cancers<sup>42</sup>. Our current observations with experiments involving luciferase  
229 assay and siRNA mediated RNA interference, in the back drop of ENCODE data,  
230 clearly establish that Hmrhl functions an enhancer RNA and positively regulates its  
231 parental *phkb* gene.

232 Though siRNAs are known to have off target effects, the fact that two different pools of  
233 siRNAs generated the same effect, one of them being a smart pool from Dharmacon  
234 designed to target specific region of interest, the down-regulation of *phkb* can be held as a  
235 specific consequence rather than a simple, non-specific off target effect. Further, given the  
236 fact that splicing is predominantly co-transcriptional<sup>43-45</sup>, it is highly unlikely that siRNAs  
237 directed against Hmrhl would affect the corresponding intron and through it the primary  
238 transcript of the parent gene leading to its down-regulation. In fact the presence of RNA  
239 PolII, transcription factors and active epigenetic marks at 5' end of Hmrhl strongly suggest it  
240 to be an independent transcript, rather than being a spliced product of/ arising from the  
241 PHKB primary transcript. Therefore, we propose that the down-regulation of *phkb* upon

242 knockdown of *Hmrhl* is related to regulation of *phkb* transcription by the *Hmrhl* enhancer  
243 RNA, rather than being mediated through the intron or the primary transcript.

244 The human *phkb* gene is located on the chromosome 16: 47,461,123-47,701,523 (240kb,  
245 GRCh38) at 16q12.1 cytogenetic region, on the forward strand. It is involved in the  
246 breakdown of glycogen to produce glucose. An up-regulation of *phkb* gene to produce  
247 more glucose is arguably beneficial for the cancer cells in order to sustain their increased  
248 metabolic rate and proliferation. It has indeed been reported recently that *phkb* gene  
249 promotes glycogen breakdown and aids cancer cell survival<sup>46</sup>. In fact PHKB shows  
250 medium to high levels of expression in several blood cancers as shown in cell line atlas  
251 data, with highest level of expression seen in K562 (supplementary Fig. S5).

252 The primary cause of chronic myelogenous leukemia is a translocation between  
253 chromosomes 9 and 22, which generates the shortened chromosome 22 known as  
254 Philadelphia chromosome<sup>47</sup>. This translocation creates a fusion oncogene, BCR-ABL,  
255 which codes for a constitutively active Tyrosine Kinase protein. This protein in turn  
256 activates a cascade of genes involved in cell cycle and inhibits those involved in DNA  
257 repair, thus leading to an uncontrolled growth of CML cells with an accumulation of  
258 secondary mutations<sup>47</sup>. Corroborating this, a very recent study by Zhou et al (2018)<sup>48</sup> has  
259 revealed a catalogue of sequence, structural and copy number variations in K562 genome.  
260 They show that K562 genome is near triploid in nature, shows insertion of several novel  
261 LINE and Alu elements, multiple chromosomal translocations including the hallmark BCR/  
262 ABL translocation, and an array of indels, SNPs and other mutations. Further, genome wide  
263 association studies (GWAS) show that more than 90% of the disease associated SNPs fall in  
264 the noncoding portions of the genome and that many SNPs fall within or very close to  
265 enhancers<sup>10, 49</sup>. Cavalli et al (2016)<sup>50</sup> sequenced a number of ENCODE cell lines and showed

266 that highest number of the allele specific, disease associated SNPs were detected in K562.  
267 Previous studies have also revealed that cancer cells acquire de novo enhancers at driver  
268 genes. For example, Hnisz et al (2013)<sup>10</sup> identified super enhancers associated with key  
269 oncogenes in 18 different cancers with the help of ChIP-seq for H3K27Ac mark. The gene  
270 desert region around the Myc oncogene acquires H3K27Ac enhancer mark in colorectal  
271 cancer, pancreatic cancer and T-cell leukemia, which is absent in the healthy individuals<sup>10</sup>.  
272 In view of all the above observations, we propose that Hmrhl locus has gained an  
273 enhancer/ super enhancer function in the K562 cells either due to change/s in the primary  
274 sequence or due to a change in the activity/ availability of factors like enzymes,  
275 transcription factors, looping factors etc., or due to a combination of many such events.

276 Our luciferase reporter assay revealed that insert 3 (1.5kb), which included both the -1KB  
277 upstream sequence as well as the +500bp downstream sequence of Hmrhl start site produced  
278 a very strong signal with the enhancer vector as compared to the other two inserts. In fact, of  
279 the two H3K27Ac peaks formed at the 5' region of Hmrhl, one is downstream of the  
280 transcription start site of Hmrhl while the other is upstream of it. Interestingly, when we  
281 analysed -1kb Hmrhl upstream sequence, it was revealed that they possess sequences very  
282 similar to the core sequence of viral enhancers namely AAAACCAC and  
283 GTGGTTTGAA<sup>51</sup> (Fig. S6). These viral enhancers are precisely conserved in the mouse as  
284 well as human immunoglobulin heavy chain gene enhancers<sup>52-55</sup>. Not only the B cells, even  
285 the T cells and haematopoietic cells in general, have specific viral enhancers which are  
286 located within introns<sup>56-58</sup>. Several viruses including the polyoma virus and the Molony  
287 murine leukemia virus (MoMLV) possess these enhancer elements and any mutations in the  
288 core sequence, 'AAAACCAC', have been shown to cause increased incidence of erythro  
289 leukemias<sup>59-61</sup>. A group of mammalian transcription factors involved in haematopoiesis  
290 called Core Binding Factor (CBF), binds to the core site of many retroviral enhancer

291 elements and also to the enhancers of T-cell receptor genes<sup>62-63</sup>. One of the subunits of CBF,  
292 CBF- $\alpha$ , also known as AML1 (Acute Myeloid Leukemia 1), is known to be rearranged by  
293 chromosomal translocations in myeloproliferative diseases and mutations in core AML1  
294 sites in murine leukemia viruses are known to affect their disease specificity and latency<sup>59, 62,</sup>  
295 <sup>64-66</sup>. In all probability, the viral enhancer elements in the immediate upstream region of  
296 Hmrhl seem to play a critical role in conferring the enhancer properties to Hmrhl in K562  
297 erythro-leukemia cells. In essence the viral enhancers could mediate the enhancer evolution  
298 in the human genome. Though our analysis of the Hmrhl locus and its 1kb upstream region  
299 did not reveal any variations in the sequence, it may be noted here that interrogating a  
300 complex cancer genome like that of K562 is not a simple task by any means. Since K562  
301 genome is triploid in nature and bears multiple mutations, we advocate that a blend of  
302 different genetic/ epigenetic alterations could have rendered the enhancer properties to the  
303 Hmrhl locus.

304 The *phkb* gene appears to share the promoter with its upstream gene, ITFG1, but it remains  
305 to be seen if Hmrhl has a role in regulating ITFG1 gene as well, in leukemia.

306 Sequence conservation of noncoding regions is suggested to indicate the occurrence of  
307 enhancers<sup>67</sup>. In this context, it may be noted that both Mrhl and Hmrhl are transcribed from  
308 the introns of *phkb* gene and show significant sequence conservation from mouse to human  
309 as seen in current studies. The fact that even the mouse counterpart, Mrhl exhibits the  
310 enhancer marks, H3K4Me1 and HeK27Ac in the mouse erythro-leukemia cells (MEL cell  
311 line, mouse Encode database, Supplementary Fig.S7), strongly suggests a functional  
312 conservation of these two homologs, especially under leukemic conditions. Intronic  
313 enhancers/ eRNAs have been reported in case of several other genes as well <sup>39,68-69</sup>. The  
314 eRNAs are known to be unstable and low in abundance<sup>38-39</sup>, possibly due to which they

315 were not easily detected in earlier days, in the absence of high throughput techniques like  
316 RNA sequencing.

317 With respect to the mouse *Mrhl* function, our earlier studies in the mouse spermatogonial  
318 cell line, GC1-SPG had revealed that *Mrhl* down-regulation brings about the activation of  
319 Wnt signalling but does not affect its parent gene, *phkb*<sup>19</sup>. It was further reported that *Mrhl*  
320 gets down-regulated in response to induced activation of Wnt signaling<sup>20</sup>. It may be noted  
321 here that a human spermatogonial cell line is not available wherein the functions of *Mrhl*  
322 and *Hmrhl* could be aptly compared, with respect to the Wnt signalling regulation function.  
323 As far as the K562 cell line is concerned, *Hmrhl* is well expressed in these cancer cells  
324 despite the active Wnt signalling, rather than being downregulated, unlike what has been  
325 reported for its mouse counterpart in the GC1 cells<sup>20</sup>. We did not observe a translocation of  $\beta$ -  
326 catenin to the nucleus under conditions of *Hmrhl* downregulation in Hek293T cells either  
327 (Fig.S8). Even in case of mouse embryonic stem cells also, Wnt signalling regulation by  
328 *Mrhl* has not been observed (Pal et al, unpublished). These studies show that regulation of  
329 Wnt signalling by the *Mrhl* RNA is not a global phenomenon but it could be exclusive to the  
330 mouse spermatogonial cells. It may perform a completely different task in another cell type  
331 or in another cellular context, which appears to be the case with regard to the erythro  
332 leukemia cells.

333 Enhancers are regulatory elements that ensure tissue and developmental stage specific  
334 expression of genes, since all genes exist in all tissues, throughout development, but express  
335 only when/ where the enhancer is active. As mentioned earlier, genome wide association  
336 studies have revealed that enhancers are the prime targets for genetic and epigenetic  
337 changes that support cancer initiation and tumor progression. Mutations in enhancers or  
338 gain of super enhancers have been reported to favour cancer development in a number of  
339 cases<sup>8,70-72</sup>. A recent report by Corces Zimmerman et al (2014)<sup>73</sup> describes super enhancers

340 specifically in a group of AML patients. The targets of these super enhancers involve not only  
341 the key driver genes of AML but also genes encoding protein kinases and chromatin  
342 regulators, providing insights into the significance of super enhancers in the context of  
343 cancer.

344 Understanding related to enhancers and their mechanism of action is expected to advance  
345 diagnosis and therapeutic strategies for cancer and other diseases linked to altered enhancer  
346 function. Enhancer RNAs can serve as valuable biomarkers for various diseases and the  
347 expression of the causal genes can be manipulated through RNA interference mediated gene  
348 silencing for a promising remedy.

## 349 **Materials and Methods**

### 350 **Cell lines and reagents**

351 K562 (Chronic Myelogenous Leukemia/ Erythro Leukemia) cell line was obtained from  
352 NCCS Pune (India) and cultured in RPMI medium (Gibco), Hek293T cells were obtained  
353 from the American Type Culture Collection (ATCC, CRL-1573) and were cultured in  
354 Dulbecco's modified Eagle's medium (Sigma); both were supplemented with 10% fetal  
355 bovine serum (Invitrogen); and 100 units/ml penicillin-streptomycin solution (Sigma) at  
356 37°C in a humidified chamber with 5% CO<sub>2</sub>. All fine chemicals were purchased from Sigma  
357 Aldrich and Life Technologies unless otherwise specified.

### 358 **Genomic DNA; RNA isolation, Reverse Transcription and Real Time quantitative PCR**

359 Genomic DNA was extracted from K562/ Hek293T cells and used as a template for PCR  
360 reactions. The sequence for the PHKB intron 14 was obtained from the ENSEMBLE  
361 genome browser. Various primer pairs specific for Hmrhl, Actin, Phkb were obtained from  
362 Sigma and used for PCR, cloning, sequencing etc. (Table S 1). Total RNA was isolated from  
363 cultured cells with the help of TRIzol reagent (Sigma, USA), following manufacturer's

364 instructions. ~2-3 $\mu$ g of total RNA was reverse transcribed with the help of oligo(dT)<sub>17</sub>  
365 primer and Super Script III/ Revertaid Reverse Transcriptase. 1/20<sup>th</sup> of the reverse  
366 transcription product was used for PCR reaction using gene specific primers. For real-time  
367 quantitative PCR (qPCR), the cDNA was diluted to 1:10, added to Sybr green mix (Bio-Rad)  
368 and gene specific primers and the reaction was carried out and analyzed in a Biorad Real  
369 Time Detection machine.

### 370 **Northern Hybridization**

371 The sequence in the central, unique region of Hmrhl from K562 genomic DNA was cloned  
372 in pGEM 3Z(+) vector. It was linearized with HindIII enzyme and antisense digoxigenin-  
373 labeled RNA probe were generated using DIG Northern Starter Kit (Roche) according to the  
374 manufacturer's instructions. 2 $\mu$ g of total RNA was loaded on a 2% agarose gel containing  
375 1% formaldehyde and run for 2-3hrs in MOPS buffer. Hybond-N+ membrane (Amersham  
376 Bioscience) was used to transfer the RNA on to the membrane through capillary transfer  
377 methods overnight. Hybridization was carried out with DIG labeled probe at 60 °C overnight.  
378 Next day detection was carried out and the membrane was developed according to the DIG  
379 Northern Starter Kit instructions (Roche).

### 380 **Chromatin immunoprecipitation (ChIP)**

381 K562 cells (10<sup>6</sup>) were fixed in 1% formaldehyde (sigma) for 10 min at RT followed by  
382 quenching with 125 mM glycine for 5 min to stop the cross-linking reaction. After washing  
383 with PBS containing Protease Inhibitor Cocktail (Roche) twice, cells were spun down and  
384 washed with buffer A (20mM HEPES-KOH, pH7.5, 10mM EDTA pH 8.0, 0.5mMEGTA,  
385 0.25% TritonX-100), buffer B (50mM HEPES-KOH, pH7.5, 150mM NaCl, 1mMEDTA pH  
386 8.0, 0.5mMEGTA) for 5-10 min at 4<sup>0</sup> C and resuspended in buffer C (20mM HEPES-KOH,  
387 pH7.5, 1mM EDTA pH 8.0, 0.5mMEGTA, 0.1% SDS and protease inhibitor Cocktail) and



388 allow to sit on ice for 10 min. Samples were sonicated at high intensity with 40 sec on/off  
389 cycles in a Bioruptor sonicator (Diagenode) to get fragments in the range of 400-600bp. De-  
390 crosslinking was done by adding ProtK and RNase. Samples were diluted 1:5 in IP dilution  
391 buffer (20mM Tris pH7.4, 10mM NaCl, 3mM MgCl<sub>2</sub>, 1mM CaCl<sub>2</sub>, 4% NP-40, 1mM PMSF  
392 and protease inhibitor). Samples were precleared by binding with 50 µl of protein A beads.  
393 An aliquot (50 µl) of soluble chromatin was kept as input. Samples were immunoprecipitated  
394 either with the required antibodies (Ab4729 and Ab8895, Abcam) or the pre immune serum  
395 as control, O/N at 4°C. Next day 50 µl of protein A beads (Invitrogen) were added to the  
396 immune-complex and incubated at 4°C for 2 hrs. Beads were washed 2-3 times sequentially  
397 with ChIP wash buffer I (20mM Tris-cl, pH 7.4, 20mM EDTA, 1% Troton X 100, 150mM  
398 NaCl, 1mM PMSF), II (20mM Tris-cl, pH 7.4, 2mM EDTA, 1% Troton X 100, 0.1% SDS,  
399 500mM NaCl, 1mM PMSF), and III (10mM Tris-cl, 1mM EDTA, 0.25mM LiCl, 0.5%  
400 NP40, 0.5% Sodium deoxy Cholate), then washed with TE and finally chromatin was eluted  
401 in 400 µl of elution buffer (25mM Tris-Cl, 10mM EDTA, 0.5% SDS, incubated at 65<sup>0</sup>C for 30  
402 min), DNA was isolated using Promega kit and subjected to qPCR.

### 403 **Transfection and Luciferase assay**

404 Clones for luciferase assay were made from K562 genomic DNA using the sequences in the  
405 5' end of Hmrhl. The inserts were cloned in pGL4.10 (Promoter Vector), pGL4.23  
406 (Enhancer Vector, Promega) between HindIII and KpnI sites, upstream of the luciferase  
407 gene. The clones were confirmed by sequencing. Primers used are listed in table S1. K562  
408 cells were transfected with the above mentioned clones using lipofectamine reagent. Cells  
409 were grown in RPMI supplemented with 10% FBS till they reached confluence (~10<sup>6</sup> cells  
410 in a T25 flask) at which point they were harvested and re-suspended in 1ml of serum  
411 free, antibiotic free medium and distributed equally in a 6 well plate which contained  
412 medium with 7% FBS. 1µg/ml DNA (clone) was used along with double the amount (v/v)

413 of lipofectamine reagent as transfection solution, which was replaced after 24hours with  
414 complete medium and the cells were grown for another day. Cells were harvested after 48  
415 hrs, lysed in 1X reporter lysis buffer for 30 min on ice and transferred to microfuge tubes.  
416 Supernatant was collected to which substrate for luciferase was added and readings were  
417 recorded in a luminometer.

#### 418 **siRNA mediated down-regulation of Hmrhl**

419 Four different siRNAs, mapping to the unique, conserved region of Hmrhl were purchased  
420 from Sigma 1. 5'-ccaguuacagcaaguacuu-3'; 5'-aaguacuugcuguaacugg-3' 2. 5'-  
421 cauguugcugcuuugguu-3'; 5'-aagccaaagcagcaacaug-3' 3. 5'-gugacaaagcguucggau-3';  
422 5'auaccgaacgcuuugucac-3' 4. 5'-cuaauccaauauauaaa-3'; 3'-uauuuauauauuggau-3'. A  
423 pool of these siRNAs was used for down regulation experiments. K562 cells/ Hek293T cells  
424 were transfected with 100nm siRNA per 1.5 ml of the medium (7% FBS), with lipofectamine  
425 2000 reagent in a 6 well plate as described above. Medium was replaced with complete  
426 medium (10% FBS) after 24 hrs. Cells were harvested after 48 hrs and RNA isolated and  
427 scored for Hmrhl, PHKB, Actin by qPCR. Scrambled siRNA was used for control. Another  
428 pool of siRNAs from Dharmacon (Table 1) was also used to down regulate Hmrhl and the  
429 effect was examined in both K562 and GM12878 cell lines.

#### 430 **Immunostaining**

431 Hek293T cells grown on coverslips were fixed for 20 min in 4% paraformaldehyde in PBS,  
432 washed with PBS, permeabilized with 0.1% Triton X-100 for 15 min, and blocked with 1%  
433 bovine serum albumin (BSA) for 1h. Cells were incubated with primary antibody ( $\beta$ -catenin  
434 antibody, Abcam, 1:100 dilution in 0.1% BSA) at room temperature for 45 min followed by  
435 three washes with 0.1% PBST (PBS + 0.1% Tween 20) and incubation with Alexa Flour  
436 488 secondary antibody (1:400 dilution in 0.1% BSA) for 45 min at room temperature,

437 washed thrice with 0.1% PBST, stained with 1 µg/ml DAPI (4,6- diamidino- 2-  
438 phenylindole), washed and mounted in Dabco (Sigma). Images were acquired in an LSM  
439 510 Meta confocal microscope (Zeiss) and analysed by image analysis software  
440 provided by Carl Zeiss.

#### 441 **Coding Potential and evolutionary conservation analysis**

442 Coding potential of Hmrhl was evaluated with NCBI-ORF finder and CPAT showing the  
443 coding probability of ~ 0.99 due to the presence of 1510 bp-long ORF, partially similar (31.1  
444 % similarity in end-to-end global alignment) to the LINE1 ORF2 sequence. To confirm the  
445 plausible coding potential of Hmrhl carrying the sequence similar to LINE1-ORF2,  
446 PhyloCSF (Phylogenetic Codon Substitution Frequencies) was run showing and strongly  
447 advocating that no approximate coding regions or novel coding regions are present.  
448 The evolutionary protein-coding potential as determined by Broad Institute's PhyloCSF data  
449 was visualized in UCSC Genome Browser. Furthermore, the absence of Kozak Sequence near  
450 the ORF present on HMrhl was confirmed using the online tool "A program for identifying  
451 the initiation codons in cDNA sequences".

452 For the phylogenetic tree, regions similar to Hmrhl region across 23 species were identified  
453 using Ensembl comparative region analysis and the sequences extracted accordingly for each  
454 species from Ensembl were used for Multiple Sequence Alignment (MSA) using Clustal  
455 Omega leading to the generation of UPGMA tree data in Newick format which was applied  
456 for the construction of circular tree in iTOL (Interactive Tree of Life).

457 For the histone marks at Hmrhl locus, raw data for Histone marks (H3K27ac, H3K4me1, and  
458 H3k4me3) was downloaded from UCSC genome browser. After quality processing, FastQ

459 files were aligned against human hg19 genome assembly using TopHat and aligned BAM  
460 files were sorted and further used for visualization in IGV Genome Browser.

## 461 **References**

- 462 1. Dunham I, Kundaje A, Aldred SF, et al. ENCODE Project Consortium. An integrated  
463 encyclopedia of DNA elements in the human genome. *Nature*. 2012; 489:57–74.
- 464 2. Mercer TR, Dinger ME, Mattick JS. Long non-coding RNAs: insights into functions.  
465 *Nature reviews genetics*. 2009;10(3):155.
- 466 3. Nagano T, Fraser P. No-nonsense functions for long noncoding RNAs. *Cell*. 2011  
467 15;145(2):178-81.
- 468 4. Blackwood EM, Kadonaga JT. Going the distance: a current view of enhancer action.  
469 *Science*. 1998;281(5373):60-3.
- 470 5. Heintzman ND, Hon GC, Hawkins RD, Kheradpour P, Stark A, Harp LF, Ye Z, Lee LK,  
471 Stuart RK, Ching CW, Ching KA. Histone modifications at human enhancers reflect global  
472 cell-type-specific gene expression. *Nature*. 2009;459(7243):108-12.
- 473 6. Thurman RE, Rynes E, Humbert R, Vierstra J, Maurano MT, Haugen E, Sheffield NC,  
474 Stergachis AB, Wang H, Vernot B, Garg K. The accessible chromatin landscape of the  
475 human genome. *Nature*. 2012;489(7414):75-82.
- 476 7. Sakabe NJ, Savic D, Nobrega MA. Transcriptional enhancers in development and disease.  
477 *Genome biology*. 2012;13(1):238.
- 478 8. Lovén J, Hoke HA, Lin CY, Lau A, Orlando DA, Vakoc CR, Bradner JE, Lee TI, Young  
479 RA. Selective inhibition of tumor oncogenes by disruption of super-enhancers. *Cell*.  
480 2013;153(2):320-34.
- 481 9. Whyte WA, Orlando DA, Hnisz D, Abraham BJ, Lin CY, Kagey MH, Rahl PB, Lee TI,  
482 Young RA. Master transcription factors and mediator establish super-enhancers at key cell  
483 identity genes. *Cell*. 2013;153(2):307-19.
- 484 10. Hnisz D, Abraham BJ, Lee TI, Lau A, Saint-André V, Sigova AA, Hoke HA, Young RA.  
485 Super-enhancers in the control of cell identity and disease. *Cell*. 2013;155(4):934-47.
- 486 11. Kim TK, Hemberg M, Gray JM, Costa AM, Bear DM, Wu J, Harmin DA, Laptewicz M,  
487 Barbara-Haley K, Kuersten S, Markenscoff-Papadimitriou E. Widespread transcription at  
488 neuronal activity-regulated enhancers. *Nature*. 2010;465(7295):182-7.
- 489 12. Ørom UA, Derrien T, Beringer M, Gumireddy K, Gardini A, Bussotti G, Lai F, Zytnicki  
490 M, Notredame C, Huang Q, Guigo R. Long noncoding RNAs with enhancer-like function in  
491 human cells. *Cell*. 2010;143(1):46-58.

- 492 13. Mousavi K, Zare H, Dell'Orso S, Grontved L, Gutierrez-Cruz G, Derfoul A, Hager GL,  
493 Sartorelli V. eRNAs promote transcription by establishing chromatin accessibility at defined  
494 genomic loci. *Molecular cell*. 2013;51(5):606-17.
- 495 14. Lam MT, Li W, Rosenfeld MG, Glass CK. Enhancer RNAs and regulated transcriptional  
496 programs. *Trends in biochemical sciences*. 2014;39(4):170-82.
- 497 15. Xiang JF, Yin QF, Chen T, Zhang Y, Zhang XO, Wu Z, Zhang S, Wang HB, Ge J, Lu X,  
498 Yang L. Human colorectal cancer-specific CCAT1-L lncRNA regulates long-range chromatin  
499 interactions at the MYC locus. *Cell research*. 2014;24(5):513-31.
- 500 16. Kim T, Cui R, Jeon YJ, Lee JH, Lee JH, Sim H, Park JK, Fadda P, Tili E, Nakanishi H,  
501 Huh MI. Long-range interaction and correlation between MYC enhancer and oncogenic long  
502 noncoding RNA CARLo-5. *Proceedings of the National Academy of Sciences*. 2014;  
503 111(11):4173-8.
- 504 17. Nishant KT, Ravishankar H, Rao MR. Characterization of a mouse recombination hot  
505 spot locus encoding a novel non-protein-coding RNA. *Molecular and cellular biology*.  
506 2004;24(12):5620-34.
- 507 18. Ganesan G, Rao SM. A novel noncoding RNA processed by Drosha is restricted to  
508 nucleus in mouse. *RNA*. 2008;14(7):1399-410.
- 509 19. Arun G, Akhade VS, Donakonda S, Rao MR. mrhl RNA, a long noncoding RNA,  
510 negatively regulates Wnt signaling through its protein partner Ddx5/p68 in mouse  
511 spermatogonial cells. *Molecular and cellular biology*. 2012;32(15):3140-52.
- 512 20. Akhade VS, Dighe SN, Kataruka S, Rao MR. Mechanism of Wnt signaling induced down  
513 regulation of mrhl long non-coding RNA in mouse spermatogonial cells. *Nucleic acids  
514 research*. 2016;44(1):387-401.
- 515 21. Akhade VS, Arun G, Donakonda S, Satyanarayana Rao MR. Genome wide chromatin  
516 occupancy of mrhl RNA and its role in gene regulation in mouse spermatogonial cells. *RNA  
517 biology*. 2014;11(10):1262-79.
- 518 22. Kataruka S, Akhade VS, Kayyar B, Rao MR. Mrhl lncRNA mediates meiotic  
519 commitment of mouse spermatogonial cells by regulating Sox8 expression. *Molecular and  
520 Cellular Biology*. 2017;MCB-00632.
- 521 23. Look AT. Oncogenic transcription factors in the human acute leukemias. *Science*.  
522 1997;278(5340):1059-64.
- 523 24. Darnell JE. Transcription factors as targets for cancer therapy. *Nature Reviews Cancer*.  
524 2002;2(10):740-9.
- 525 25. Garraway LA, Lander ES. Lessons from the cancer genome. *Cell*. 2013;153(1):17-37.
- 526 26. Panne D. The enhanceosome. *Current opinion in structural biology*. 2008;18(2):236-42.

- 527 27. Lelli KM, Slattery M, Mann RS. Disentangling the many layers of eukaryotic  
528 transcriptional regulation. *Annual review of genetics*. 2012;46:43-68.
- 529 28. Ong CT, Corces VG. Enhancer function: new insights into the regulation of tissue-  
530 specific gene expression. *Nature Reviews Genetics*. 2011;12(4):283-93.
- 531 29. Spitz F, Furlong EE. Transcription factors: from enhancer binding to developmental  
532 control. *Nature Reviews Genetics*. 2012;13(9):613-26.
- 533 30. Krivega I, Dean A. Enhancer and promoter interactions—long distance calls. *Current  
534 opinion in genetics & development*. 2012;22(2):79-85.
- 535 31. Lee TI, Young RA. Transcriptional regulation and its misregulation in disease. *Cell*.  
536 2013;152(6):1237-51.
- 537 32. Goodman RH, Smolik S. CBP/p300 in cell growth, transformation, and development.  
538 *Genes & development*. 2000;14(13):1553-77.
- 539 33. Visel A, Blow MJ, Li Z, Zhang T, Akiyama JA, Holt A, Plajzer-Frick I, Shoukry M,  
540 Wright C, Chen F, Afzal V. ChIP-seq accurately predicts tissue-specific activity of enhancers.  
541 *Nature*. 2009;457(7231):854-8.
- 542 34. Tuan D, Kong S, Hu K. Transcription of the hypersensitive site HS2 enhancer in erythroid  
543 cells. *Proceedings of the National Academy of Sciences*. 1992;89(23):11219-23.
- 544 35. Hah N, Murakami S, Nagari A, Danko CG, Kraus WL. Enhancer transcripts mark active  
545 estrogen receptor binding sites. *Genome research*. 2013 May 1.
- 546 36. Darrow EM, Chadwick BP. Boosting transcription by transcription: enhancer-associated  
547 transcripts. *Chromosome research*. 2013;21(6-7):713-24.
- 548 37. Lai F, Shiekhatar R. Enhancer RNAs: the new molecules of transcription. *Current  
549 opinion in genetics & development*. 2014;25:38-42.
- 550 38. Kim TK, Hemberg M, Gray JM. Enhancer RNAs: a class of long noncoding RNAs  
551 synthesized at enhancers. *Cold Spring Harbor perspectives in biology*. 2015;7(1):a018622.
- 552 39. Li W, Notani D, Rosenfeld MG. Enhancers as non-coding RNA transcription units: recent  
553 insights and future perspectives. *Nature Reviews Genetics*. 2016;17(4):207-23.
- 554 40. Chen H, Du G, Song X, Li L. Non-coding transcripts from enhancers: new insights into  
555 enhancer activity and gene expression regulation. *Genomics, proteomics & bioinformatics*.  
556 2017 Jun 30;15(3):201-7.
- 557 41. Boivin V, Deschamps-Francoeur G, Scott MS. Protein coding genes as hosts for  
558 noncoding RNA expression. In *Seminars in cell & developmental biology 2017*. Academic  
559 Press.

- 560 42. Fatima R, Akhade VS, Pal D, Rao SM. Long noncoding RNAs in development and  
561 cancer: potential biomarkers and therapeutic targets. *Molecular and cellular therapies*.  
562 2015;3(1):5.
- 563 43. Tilgner H, Knowles DG, Johnson R, Davis CA, Chakraborty S, Djebali S, Curado J,  
564 Snyder M, Gingeras TR, Guigó R. Deep sequencing of subcellular RNA fractions shows  
565 splicing to be predominantly co-transcriptional in the human genome but inefficient for  
566 lncRNAs. *Genome research*. 2012; 22(9):1616-25.
- 567 44. Oesterreich FC, Herzog L, Straube K, Huger K, Howard J, Neugebauer KM. Splicing of  
568 nascent RNA coincides with intron exit from RNA polymerase II. *Cell*. 2016; 7;165(2):372-  
569 81.
- 570 45. Wallace EW, Beggs JD. Extremely fast and incredibly close: co-transcriptional splicing in  
571 budding yeast. *Rna*. 2017:rna-060830.
- 572 46. Terashima M, Fujita Y, Togashi Y, Sakai K, De Velasco MA, Tomida S, Nishio K.  
573 KIAA1199 interacts with glycogen phosphorylase kinase  $\beta$ -subunit (PHKB) to promote  
574 glycogen breakdown and cancer cell survival. *Oncotarget*. 2014;5(16):7040.
- 575 47. Hehlmann R, Hochhaus A, Baccarani M. Chronic myeloid leukaemia. *The Lancet*.  
576 2007;370(9584):342-50.
- 577 48. Zhou B, Ho S. S, X. Zhu, X. Zhang, N. Spies, S. Byeon, J. G. Arthur, R. Pattni, N. Ben-  
578 Efraim, M. S. Haney, et al., "Comprehensive, integrated and phased whole-genome analysis  
579 of the primary encode cell line k562," bioRxiv, p. 192344, 2018.
- 580 49. Maurano MT, Humbert R, Rynes E, Thurman RE, Haugen E, Wang H, Reynolds AP,  
581 Sandstrom R, Qu H, Brody J, Shafer A. Systematic localization of common disease-  
582 associated variation in regulatory DNA. *Science*. 2012;337(6099):1190-5.
- 583 50. Cavalli M, Pan G, Nord H, Wallerman O, Arzt EW, Berggren O, Elvers I, Eloranta ML,  
584 Rönnblom L, Toh KL, Wadelius C. Allele-specific transcription factor binding to common  
585 and rare variants associated with disease and gene expression. *Human genetics*. 2016  
586 1;135(5):485-97.
- 587 51. Maeda H, Araki K, Kitamura D, Wang J, Watanabe T. Nuclear factors binding to the  
588 human immunoglobulin heavy-chain gene enhancer. *Nucleic acids research*. 1987;  
589 15(7):2851-69.
- 590 52. Banerji J, Rusconi S, Schaffner W. Expression of a  $\beta$ -globin gene is enhanced by remote  
591 SV40 DNA sequences. *Cell*. 1981;27(2):299-308.
- 592 53. de Villiers J, Schaffner W. A small segment of polyoma virus DNA enhances the  
593 expression of a cloned  $\beta$ -globin gene over a distance of 1400 base pairs. *Nucleic acids*  
594 *research*. 1981;9(23):6251-64.

- 595 54. Levinson B, Khoury G, Woude GV, Gruss P. Activation of SV40 genome by 72-base pair  
596 tandem repeats of Moloney sarcoma virus. *Nature*. 1982;295(5850):568-72.
- 597 55. Gillies SD, Morrison SL, Oi VT, Tonegawa S. A tissue-specific transcription enhancer  
598 element is located in the major intron of a rearranged immunoglobulin heavy chain gene.  
599 *Cell*. 1983;33(3):717-28.
- 600 56. Mosthaf L, Pawlita M, Gruss P. A viral enhancer element specifically active in human  
601 haematopoietic cells. *Nature*. 1985;315(6020):597-600.
- 602 57. Bories JC, Loiseau P, d'Auriol L, Gontier C, Bensussan A, Degos L, Sigaux F. Regulation  
603 of transcription of the human T cell antigen receptor delta chain gene. A T lineage-specific  
604 enhancer element is located in the J delta 3-C delta intron. *Journal of Experimental Medicine*.  
605 1990;171(1):75-83.
- 606 58. Hambor JE, Mennone J, Coon ME, Hanke JH, Kavathas P. Identification and  
607 characterization of an Alu-containing, T-cell-specific enhancer located in the last intron of the  
608 human CD8 alpha gene. *Molecular and Cellular Biology*. 1993;13(11):7056-70.
- 609 59. Speck NA, Renjifo B, Golemis E, Fredrickson TN, Hartley JW, Hopkins N. Mutation of  
610 the core or adjacent LVb elements of the Moloney murine leukemia virus enhancer alters  
611 disease specificity. *Genes & development*. 1990;4(2):233-42.
- 612 60. Hallberg B, Schmidt J, Luz A, Pedersen FS, Grundström T. SL3-3 enhancer factor 1  
613 transcriptional activators are required for tumor formation by SL3-3 murine leukemia virus.  
614 *Journal of virology*. 1991;65(8):4177-81.
- 615 61. Hsiang YH, Spencer D, Wang S, Speck NA, Raulet DH. The role of viral enhancer "core"  
616 motif-related sequences in regulating T cell receptor-gamma and-delta gene expression. *The*  
617 *Journal of Immunology*. 1993;150(9):3905-16.
- 618 62. Zaiman AL, Lewis AF, Crute BE, Speck NA, Lenz J. Transcriptional activity of core  
619 binding factor-alpha (AML1) and beta subunits on murine leukemia virus enhancer cores.  
620 *Journal of virology*. 1995;69(5):2898-906.
- 621 63. Sangle NA, Perkins SL. Core-binding factor acute myeloid leukemia. *Archives of*  
622 *pathology & laboratory medicine*. 2011;135(11):1504-9.
- 623 64. Lewis AF, Stacy T, Green WR, Taddesse-Heath L, Hartley JW, Speck NA. Core-binding  
624 factor influences the disease specificity of Moloney murine leukemia virus. *Journal of*  
625 *virology*. 1999;73(7):5535-47.
- 626 65. Hart SM, Foroni L. Core binding factor genes and human leukemia. *Haematologica*.  
627 2002;87(12):1307-23.
- 628 66. Sørensen, K.D., Quintanilla-Martinez, L., Kunder, S., Schmidt, J. and Pedersen, F.S.,  
629 2004. Mutation of all Runx (AML1/core) sites in the enhancer of T-lymphomagenic SL3-3  
630 murine leukemia virus unmasks a significant potential for myeloid leukemia induction and



631 favors enhancer evolution toward induction of other disease patterns. *Journal of*  
632 *virology*, 78(23),13216-13231.

633 67. Visel A, Minovitsky S, Dubchak I, Pennacchio LA. VISTA Enhancer Browser—a  
634 database of tissue-specific human enhancers. *Nucleic acids research*. 2006;35(suppl\_1):D88-  
635 92.

636 68. Ott, C.J., Blackledge, N.P., Kerschner, J.L., Leir, S.H., Crawford, G.E., Cotton, C.U. and  
637 Harris, A., 2009. Intronic enhancers coordinate epithelial-specific looping of the active CFTR  
638 locus. *Proceedings of the National Academy of Sciences*, 106(47),19934-19939.

639 69. Blattler, A., Berman, B.P., Nicolet, C.M., Witt, H., Yao, L., Farnham, P.J. and Guo, Y.,  
640 2014. Global loss of DNA methylation uncovers intronic enhancers in genes showing  
641 expression changes. *Genome biology*, 15(9), p.469.

642 70. Park SS, Kim JS, Tessarollo L, Owens JD, Peng L, Han SS, Chung ST, Torrey TA,  
643 Cheung WC, Polakiewicz RD, McNeil N. Insertion of c-Myc into Igh induces B-cell and  
644 plasma-cell neoplasms in mice. *Cancer research*. 2005 Feb 15;65(4):1306-15.

645 71. Chapuy B, McKeown MR, Lin CY, Monti S, Roemer MG, Qi J, Rahl PB, Sun HH, Yeda  
646 KT, Doench JG, Reichert E. Discovery and characterization of super-enhancer-associated  
647 dependencies in diffuse large B cell lymphoma. *Cancer cell*. 2013;24(6):777-90.

648 72. Kron KJ, Lupien M, Bailey SD. Enhancer alterations in cancer: a source for a cell identity  
649 crisis. *Genome medicine*. 2014;6(9):77.

650 73. Corces-Zimmerman MR, Eaton M, Lopez J, Ke N, Fritz C, Olson E, Majeti R, Loven J.  
651 Discovery and Characterization of Super-Enhancer-Associated Dependencies in Acute  
652 Myeloid Leukemia. *Blood*. 2014; 124:3539.

653

## 654 **Acknowledgments**

655 We thank Suma B. S. of confocal facility and Anitha G. of the sequencing facility at  
656 JNCASR. We thank members of M. R. S. Rao laboratory for suggestions. RF would like to  
657 thank Dr. Manjira Ghosh, for introduction to the ENCODE database.

## 658 **Author Contribution and disclosure of potential conflict of interest**

659 R.F. and M.R.S.R. designed the experiments, analysed the data and wrote the manuscript. R.  
660 F., S. R. C. and D. T. R. carried out the molecular and cell biological and experiments. R. F.  
661 analysed the ENCODE data. UB performed the bioinformatic analysis for phylogenetic tree,

662 CPAT, PhyloCSF and histone marks. Authors declare no conflict of interest and no  
663 competing financial interests.

#### 664 **Funding**

665 M. R. S. Rao thanks Department of Science and Technology, Government of India for J. C.  
666 Bose and SERB Distinguished Fellowships and this work was financially supported by  
667 Department of Biotechnology (DBT), Govt. of India (Grant # BT/01/COE/07/09). R. F.  
668 received financial support in the form of DBT-RAsip and S. R. C. is supported by SERB-  
669 NPDF.

#### 670 **Figure Legends**

671 **Fig.1. Blast Analysis of mouse Mrhl lncRNA identified the human homolog.**

672 **i.** Schematic representation of mouse chromosome 8 and the C3 cytogenetic region which  
673 harbours the *phkb* gene. Mrhl is transcribed from the intron 15 of mouse *phkb* gene (shown as  
674 a pale green bar). **ii.** Blast analysis of mouse Mrhl identified the homologous sequence in the  
675 human *phkb* gene. Sequence from the middle region to the 3'end of Mrhl showed high  
676 homology with its human counterpart, as indicated by the red bars (Blue arrow). **iii.** Schematic  
677 representation of Human chromosome 16 and the 16q12.1 cytogenetic region where the *phkb*  
678 gene is located. Hmrhl (shown in deep green color) is transcribed from the intron 14 of the  
679 human *phkb* gene. **iv-v.** Sequences in the human genome sharing homology with Mrhl  
680 (GrCh37). Note the stretches of 71% (iv) and 65% identities (v) of the query sequence, Mrhl,  
681 against the human *phkb* gene (only part of the sequence shown here).

682 **Fig.2. Expression and coding potential analysis of Hmrhl. a.** Quantitative real time PCR

683 analysis of Hmrhl expression showed that it is expressed in all human tissues (Brain, Heart,  
684 Kidney, lung, liver, pancreas, spleen, thymus, small intestine, colon, skeletal muscle, testes,  
685 prostate, ovary, placenta, leukocyte, from left to right) examined. Lowest expression was

686 found in skeletal muscle (SM) which was taken as control, the level of which was considered  
687 as 1 and all others were plotted in comparison to it. Highest expression was seen in  
688 spleen (spln) followed by pancreas (Pnc), testis (Tst) and other tissues. **b.** Northern  
689 blot detection of Hmrhl. Total RNA from HEK 293T and K562 cell lines were separated on a  
690 2% agarose gel and subsequently hybridized with DIG labelled Hmrhl specific riboprobe to  
691 detect the transcript (i). In parallel, methylene blue staining was used to determine the size of  
692 HMRHL, using 28S rRNA (5kb) and 18s rRNA (1.9 kb) as reference (ii). Note that the size  
693 of Hmrhl is similar to that of 28s rRNA, revealing that Hmrhl is about 5kb in size. **c.** Protein-  
694 coding potential as determined by Broad Institute's PhyloCSF data and visualized in UCSC  
695 Genome Browser, showing that Hmrhl has no coding potential. **d.** Circular phylogenetic tree  
696 built in iTOL (Interactive Tree of Life).

697 **Fig.3. Hmrhl is conserved in mammals and has gained several repeat elements in the**  
698 **primates.** Figure shows the conservation of Hmrhl across various organisms and the repeat  
699 elements present in this genomic interval (shown below the conservation tracks) in human, as  
700 visualized through the UCSC genome browser. Note the unique sequence in the middle of  
701 Hmrhl which is highly conserved across various organisms and is flanked by the repeat  
702 elements L2B, L2C, MIR, Charlie, AluY, L1PA3, AluSx which are present only in higher  
703 primates (see text for details).

704 **Fig4. Hmrhl locus exhibits hallmarks of enhancer.** **a.** ENCODE data visualized through  
705 Integrated Genome Viewer (IGV) for DNase hypersensitive sites, p300 binding, enhancer  
706 specific histone marks, H3K27Ac and H3K4Me1 and the promoter specific histone mark,  
707 H3K4Me3 at the 5' end of Hmrhl, only in K562 but not in GM12878 cells. Note the two  
708 prominent peaks (red) for the enhancer mark H3K27Ac in K562. **b-c.** Chromatin  
709 immunoprecipitation with Ab4729 (anti-H3K27Ac antibody) and Ab8895 (anti-H4K4Me1  
710 antibody) in K562 cells. Note the enrichment of both the enhancer marks at the 5' end of

711 Hmrhl in the IP fraction as compared to input/ PIS/ gene desert region (GD), that serves as a  
712 negative control.

713 **Fig.5. Hmrhl locus exhibits hallmarks of enhancer contd.. a.** Encode data shows the  
714 binding of various transcription and PolIII at the 5' end of Hmrhl. We have retained the  
715 H3K27Ac peaks in this figure also for a reference. **b.** Schematic for chromatin interaction  
716 analysis (ChiaPET data) for Hmrhl. The large purple-black peak representing histone marks  
717 on the extreme left denotes the promoter of *phkb* gene while the small purple peak at the far  
718 right represents the 5'end of Hmrhl. ChiaPET data shows the interaction of Hmrhl locus with  
719 *phkb* promoter, as represented by two black boxes (blue arrows) connected by a black line in  
720 **b.** The Hmrhl locus is expanded below in **c**, showing that this locus has enhancer  
721 properties only in K562 cell line (orange-yellow color), but not in other cell lines like  
722 GM12878, HepG2 or hESC. Genomic segments are colour coded by ENCODE as denoted  
723 in **d**, with red colour signifying active promoter (*phkb* promoter at far left, black arrow in **b**)  
724 while orange colour represents active enhancer at Hmrhl locus at far right (red arrow in **b**).

725 **Fig.6. Hmrhl is differentially expressed in various cancers. a.** Expression of Hmrhl  
726 in various normal and cancer samples as observed by qPCR. Note that Hmrhl is  
727 highly upregulated in several lymphoma samples (bracket) in comparison to  
728 normal range (arrow). In fact, of all cancers, the highest levels of Hmrhl are seen  
729 in some of the lymphoma samples. **b-c.** qPCR analysis of Hmrhl and PHKB  
730 expression showing that both are over expressed in K562 leukemia conditions as  
731 compared to GM12878 normal lymphocytes.

732 **Fig.7. Hmrhl functions as enhancer RNA. a.** Lucifaerase assay showing the intense signal  
733 of reporter activity in K562 cells with insert 3 cloned in enhancer vector. Note the low level  
734 of luciferase signal obtained with insert 2 both with promoter and enhancer vectors. **b.**

735 siRNA mediated down-regulation of Hmrhl causes down-regulation of PHKB in K562 cells  
736 treated with Hmrhl specific siRNA pool as compared to control cells without transfection  
737 and cells treated with scrambled siRNA as negative control. **c-d.** Smart pool siRNA  
738 (Dharmacon) were used against the Hmrhl region to downregulate Hmrhl and subsequently  
739 expression level of PHKB gene were checked by qPCR in both K562 and GM12878 cell  
740 lines. Scrambled siRNA was used as a negative control.

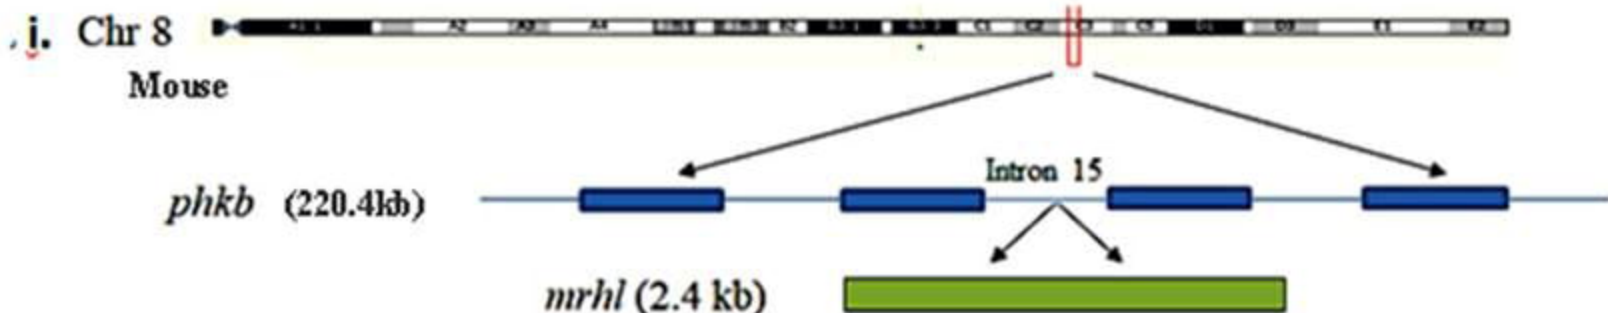

ii. NCBI BLAST of Mrhl

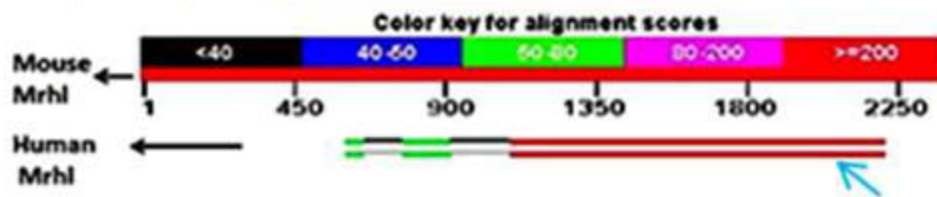

iii. Chr 16  
Human

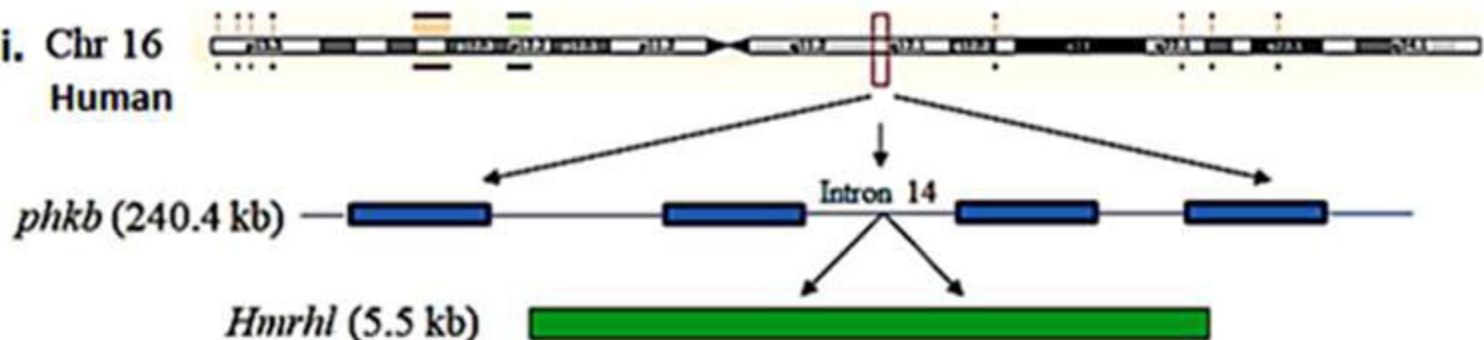

iv.

| Range 3: 47660605 to 47660748                                                                                                         | GenBank  | Graphics                                                      | Next Match | Previous Match | First Match |
|---------------------------------------------------------------------------------------------------------------------------------------|----------|---------------------------------------------------------------|------------|----------------|-------------|
| Score                                                                                                                                 | Expect   | Identities                                                    | Gaps       | Strand         |             |
| 60.8 bits(66)                                                                                                                         | 1e-05    | 108/152(71%)                                                  | 13/152(8%) | Plus/Plus      |             |
| <b>Features:</b> phosphorylase b kinase regulatory subunit beta isoform a<br>phosphorylase b kinase regulatory subunit beta isoform b |          |                                                               |            |                |             |
| Query                                                                                                                                 | 774      | GCTATTTCCCATTTCTAGGTCCTCAGTTTCTTCATCCATCAAGTTGACTGCTGA-TTTATC | 832        |                |             |
|                                                                                                                                       |          |                                                               |            |                |             |
| Sbjct                                                                                                                                 | 47660605 | GCTATTTCCCTCTCTGGGCTCAGTCTTCTCATCCATCAAGTGA-TTATGATTTATC      | 47660663   |                |             |

v.

| Range 1: 47660946 to 47662155                                                                                                         | GenBank  | Graphics                                                     | Next Match    | Previous Match |
|---------------------------------------------------------------------------------------------------------------------------------------|----------|--------------------------------------------------------------|---------------|----------------|
| Score                                                                                                                                 | Expect   | Identities                                                   | Gaps          | Strand         |
| 203 bits(224)                                                                                                                         | 1e-48    | 798/1223(65%)                                                | 134/1223(10%) | Plus/Plus      |
| <b>Features:</b> phosphorylase b kinase regulatory subunit beta isoform a<br>phosphorylase b kinase regulatory subunit beta isoform b |          |                                                              |               |                |
| Query                                                                                                                                 | 1095     | TTACCATTAGAAATCTTTCTTTGGT-GTGACCCACAACATGAAGTCCTTTTACATGACAC | 1153          |                |
|                                                                                                                                       |          |                                                              |               |                |
| Sbjct                                                                                                                                 | 47660946 | TTACCACTAGGGACCTTTCTTTGCTTGTAACCCACCACCTGAGGTGTTTCTAAATGACCA | 47661005      |                |

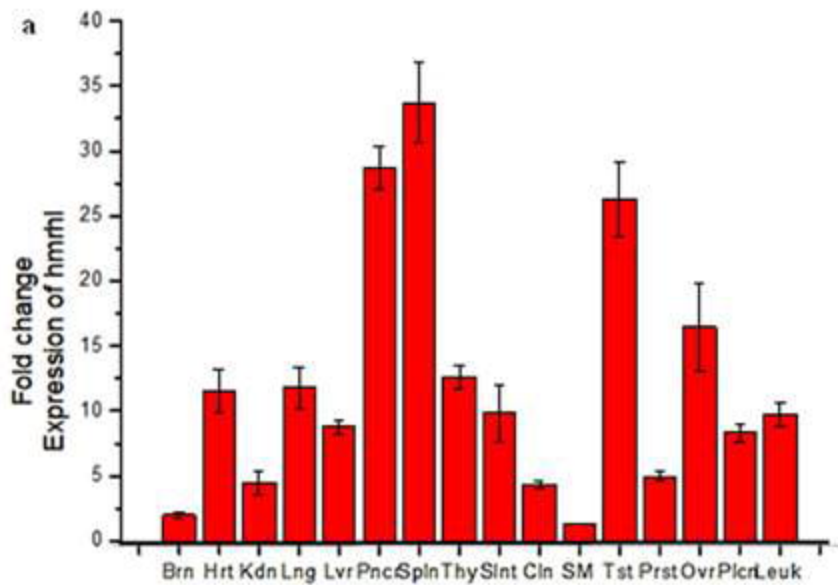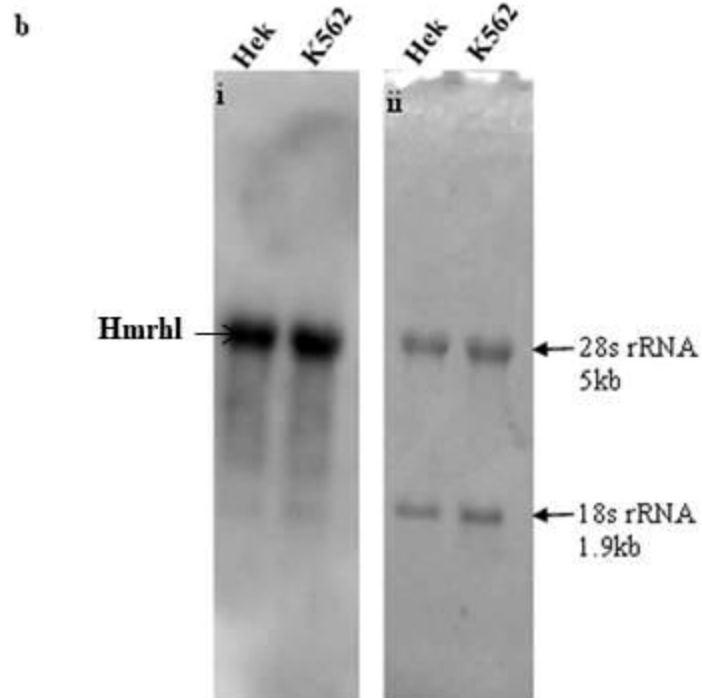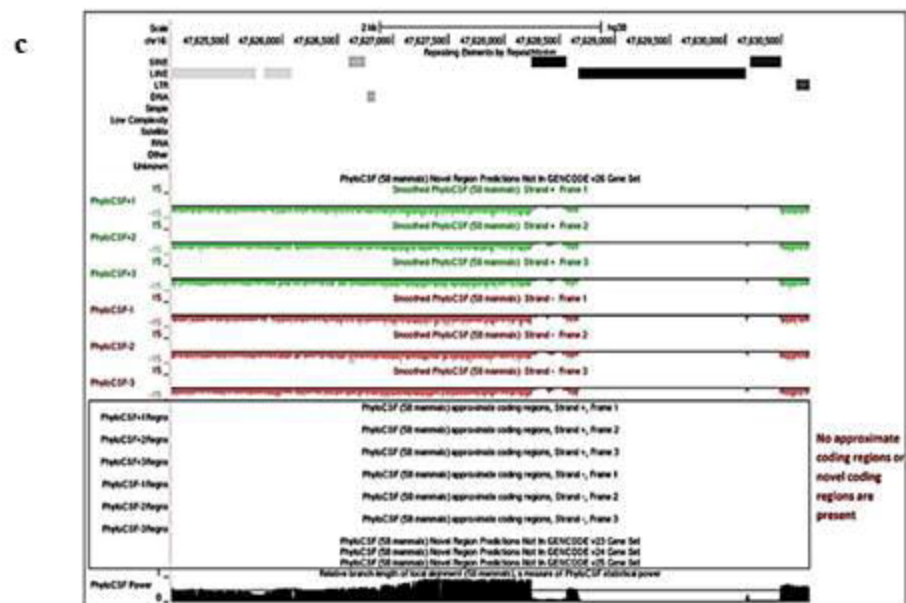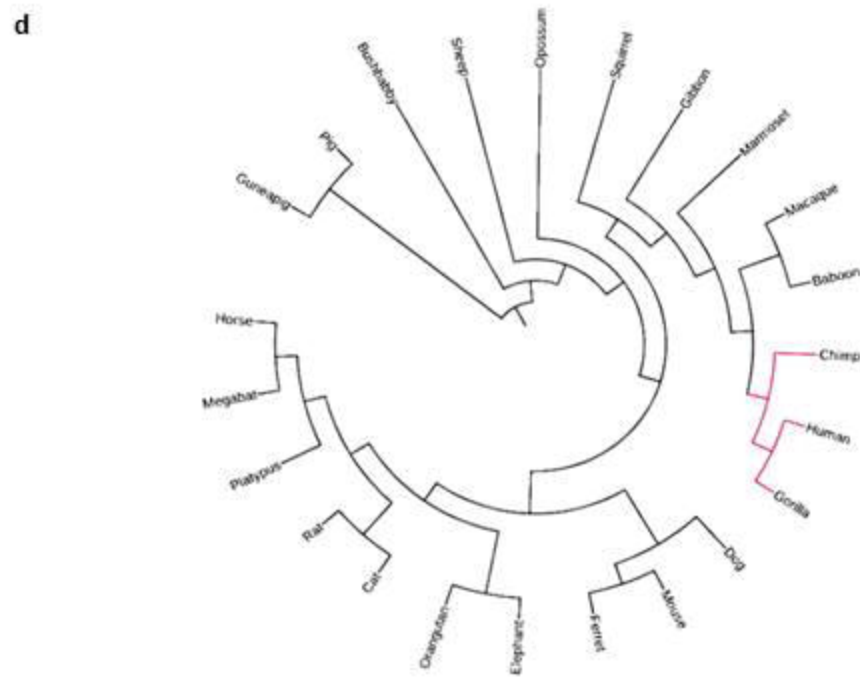

# UCSC Genome Browser on Human Feb. 2009 (GRCh37/hg19) Assembly

move <<< << < > >> >>> zoom in 1.5x 3x 10x base zoom out 1.5x 3x 10x 100x

chr16:47,658,923-47,664,446 5,524 bp. enter position, gene symbol, HGVS or search terms

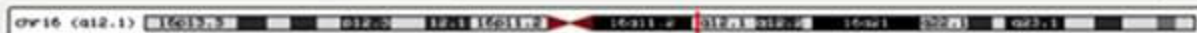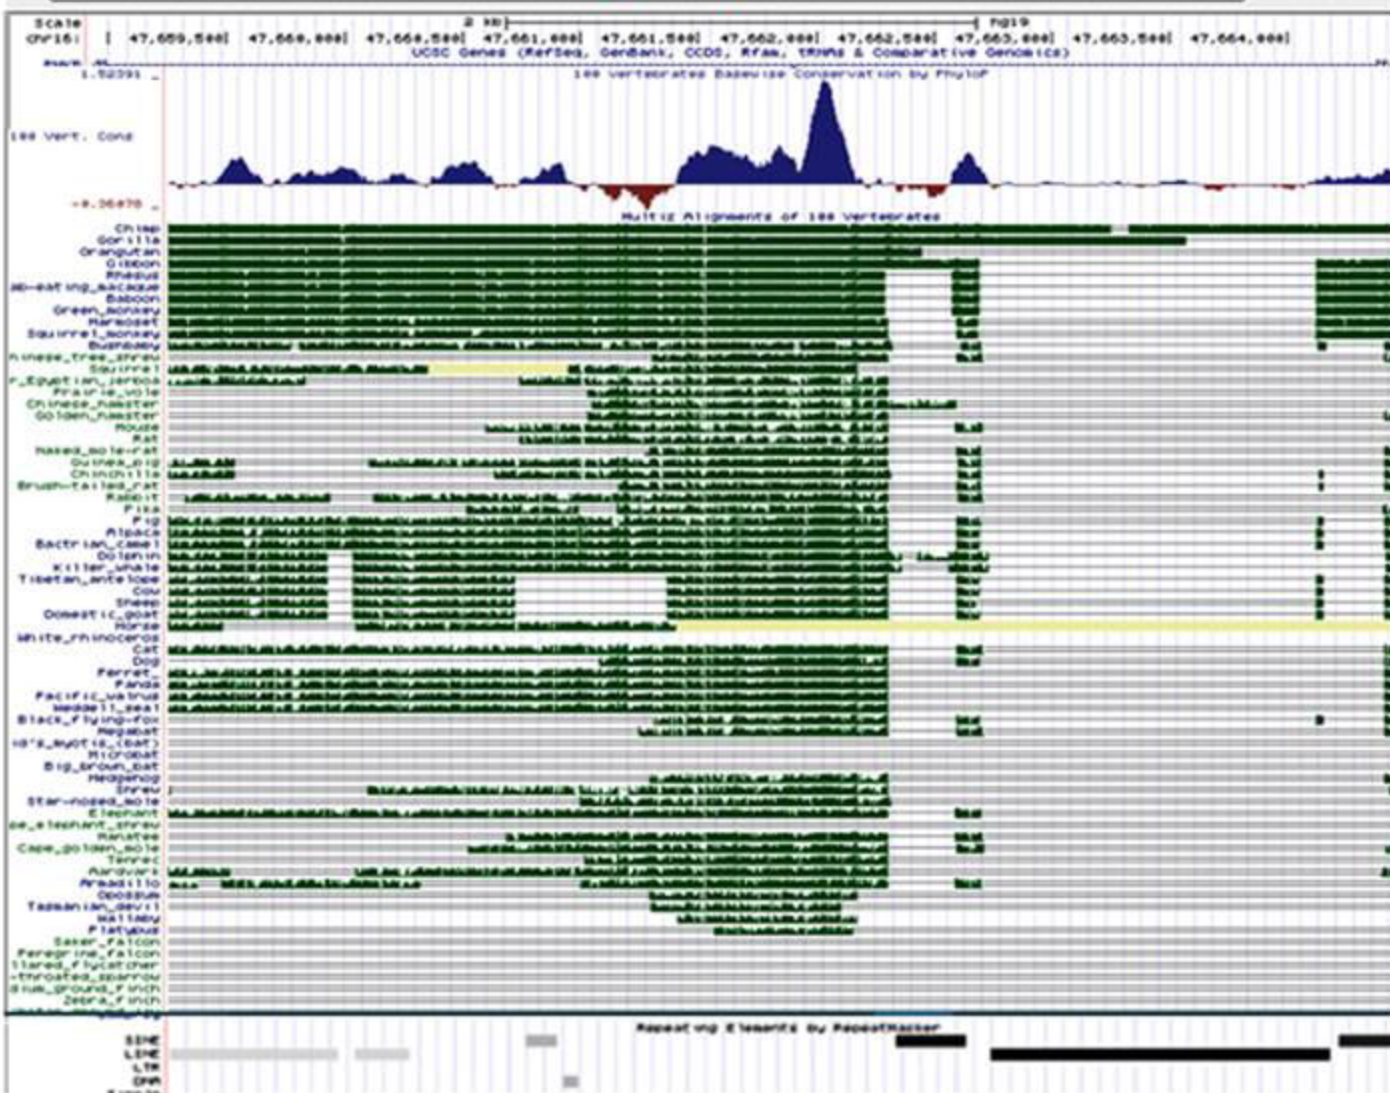

L2B      L2C      MIR      Charlie      AluY      L1PA3      AluX



**a**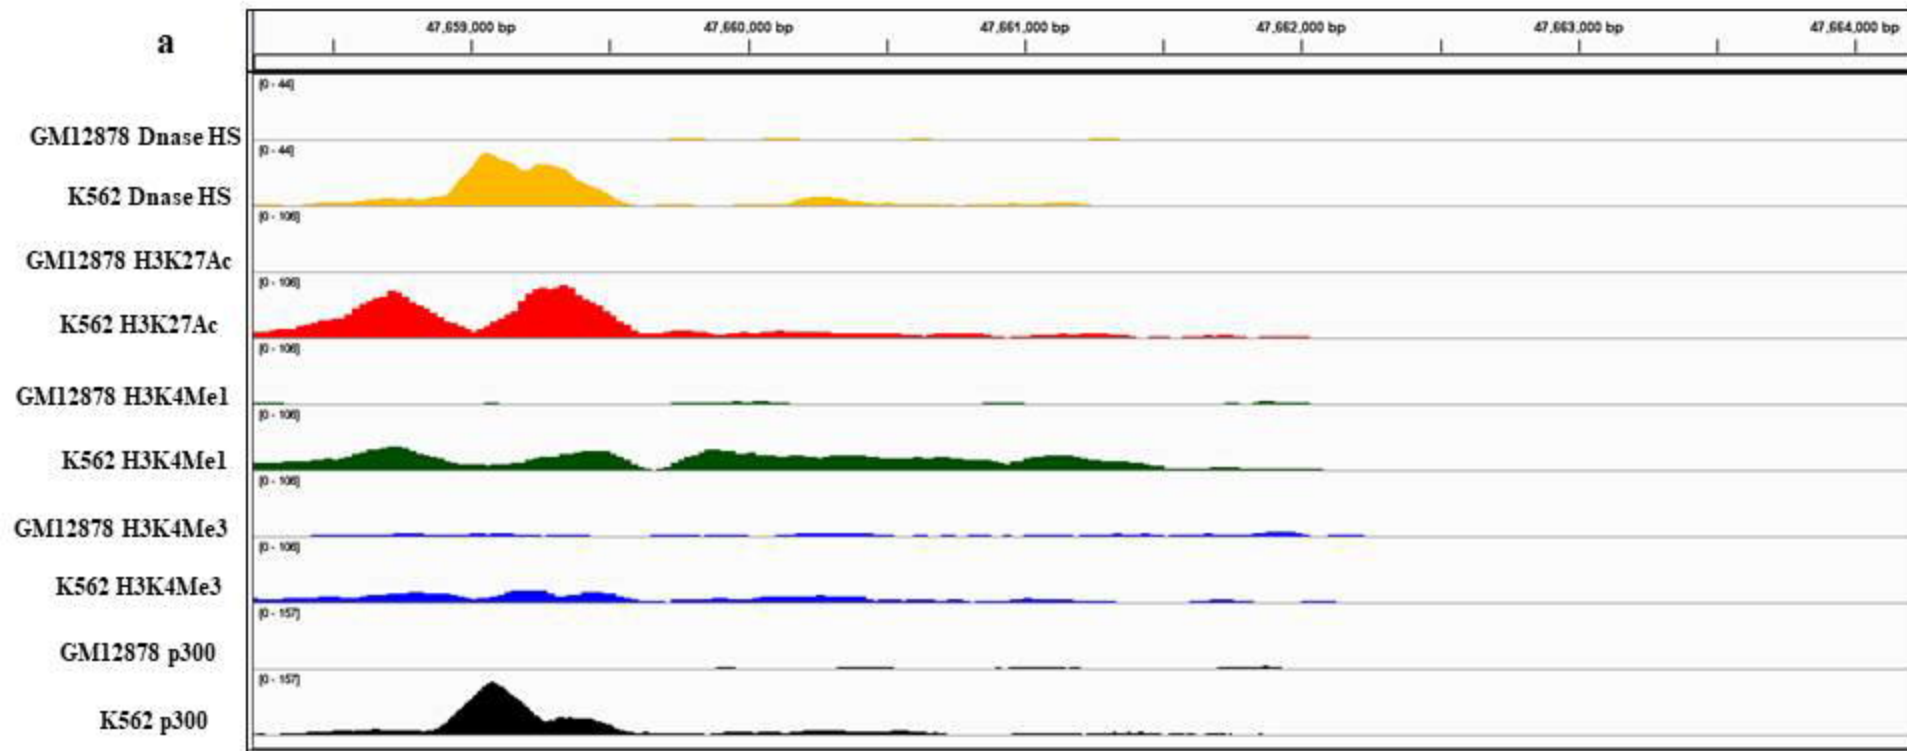**b**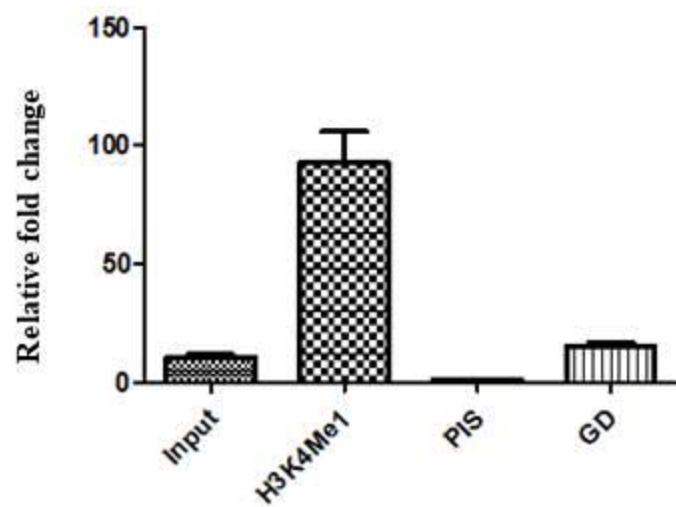**c**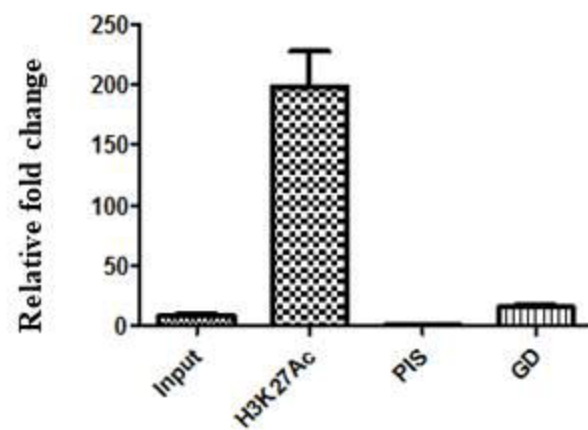

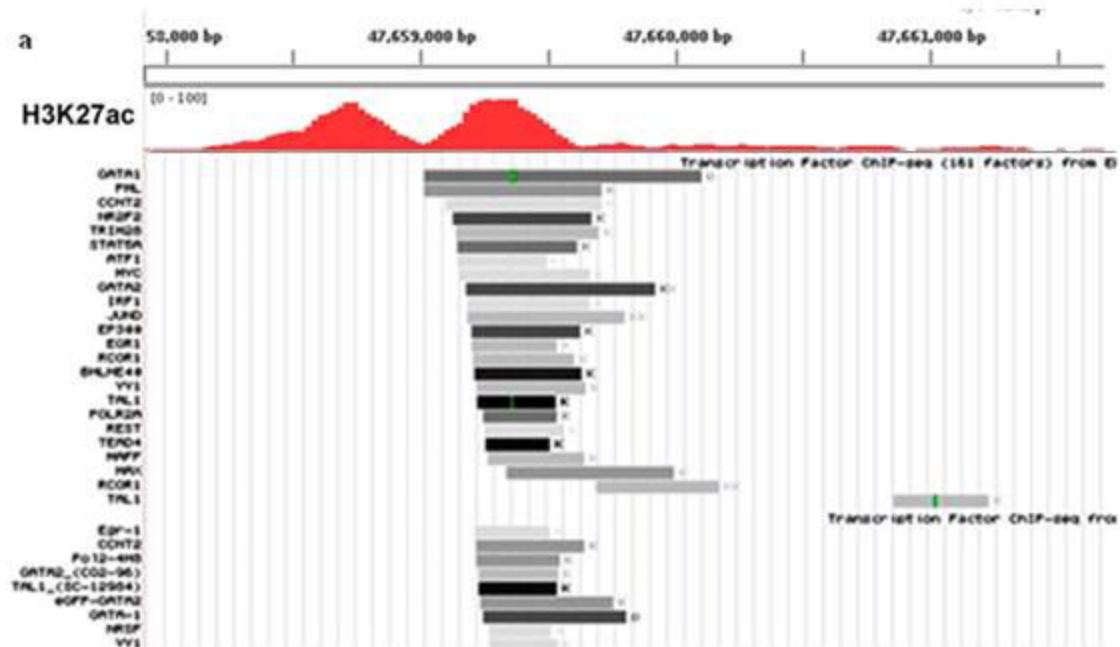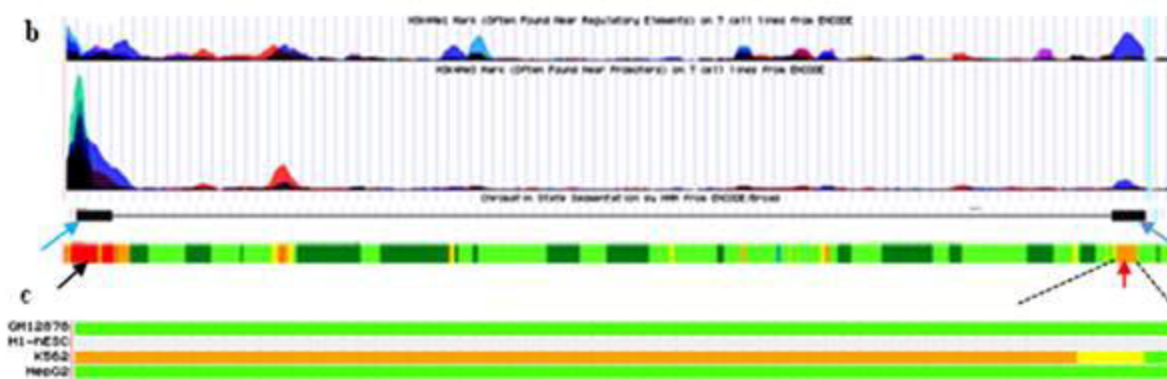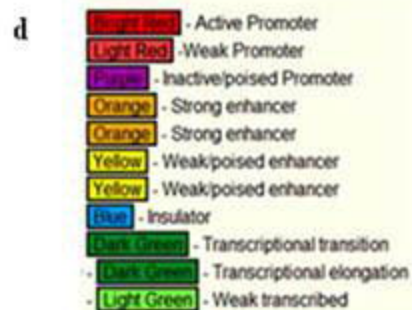

**a**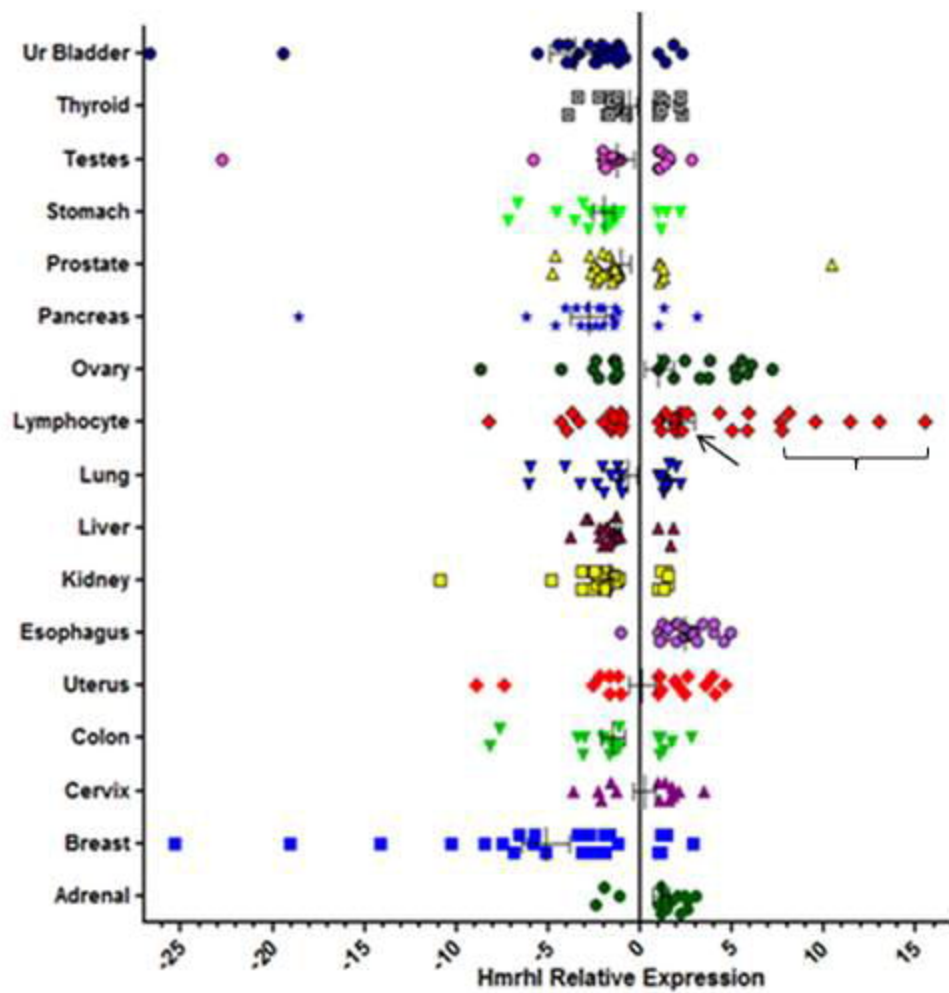**b**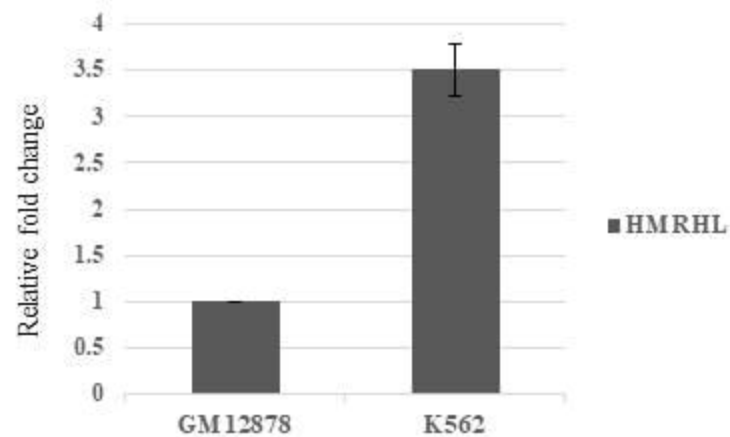**c**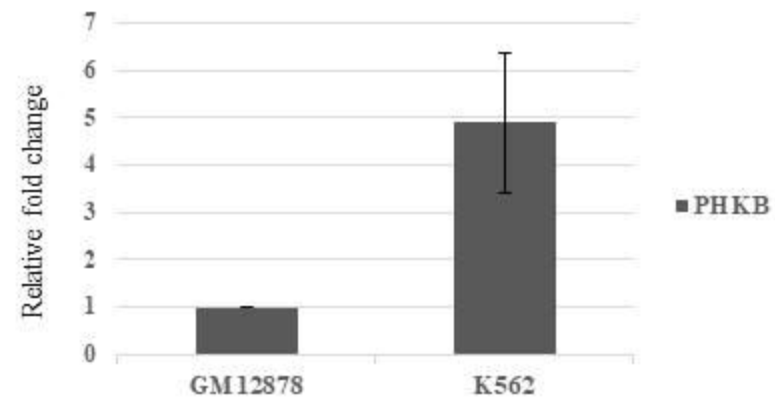

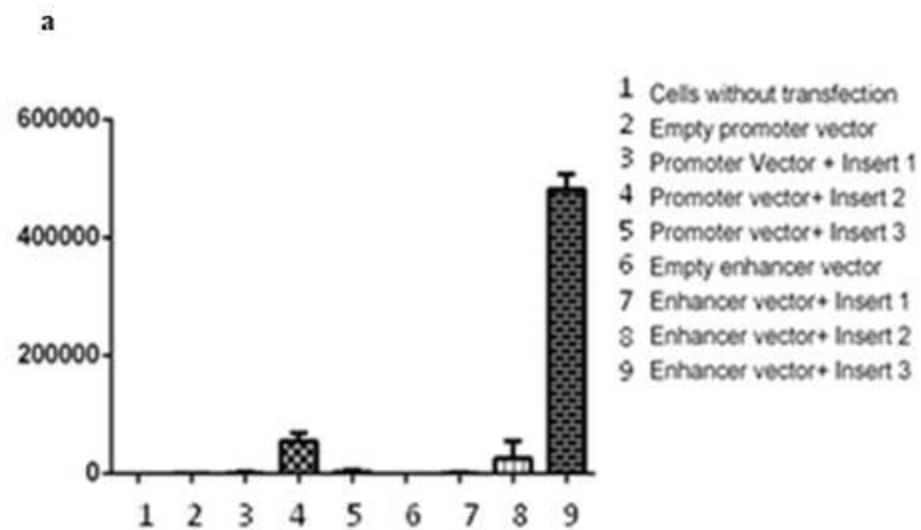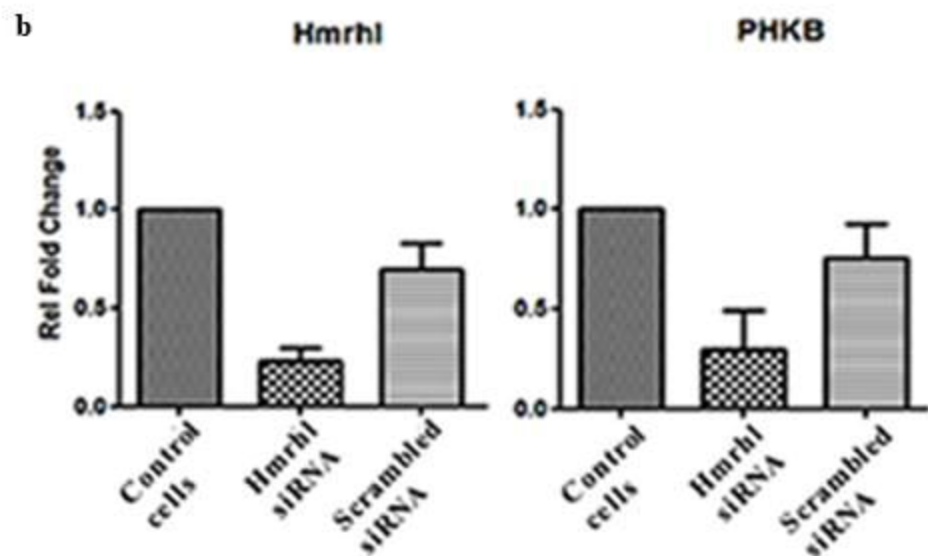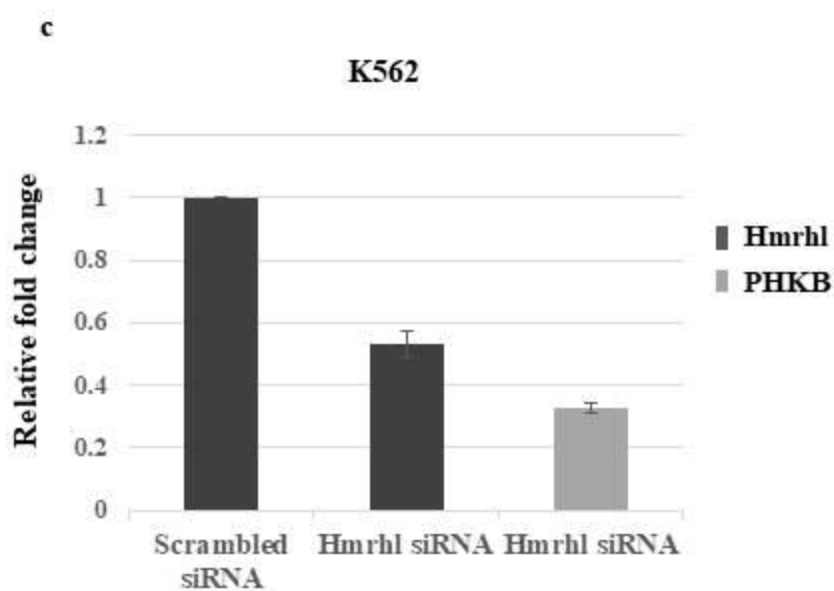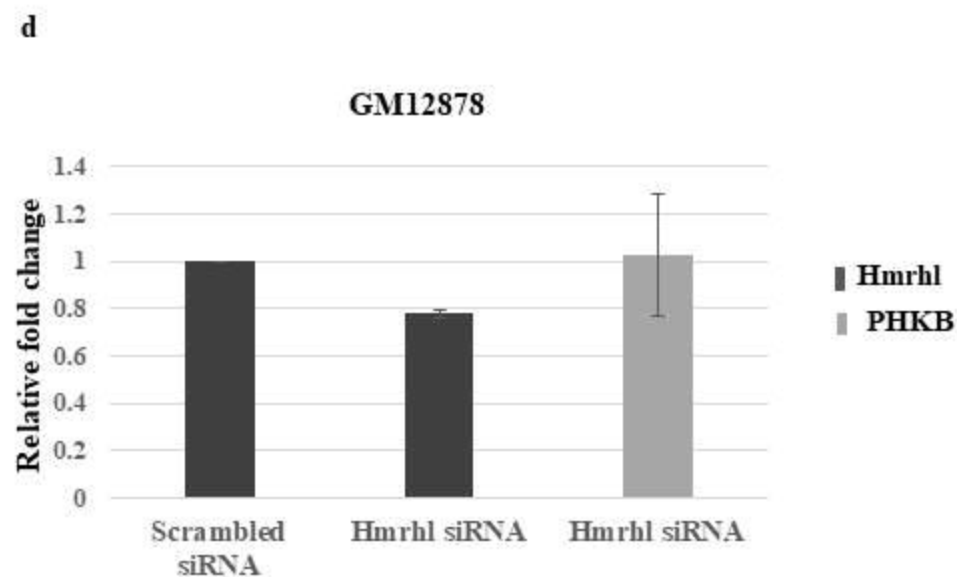

Source: https://www.biorxiv.org/content/10.1101/378984v1.full.pdf
